# Supplementary material for: Genome-wide characterization and expression analysis of the JRL gene family in response to hormones and abiotic stress in tomato (Solanum lycopersicum L.)
Source: PeerJ. 2025 Jul 21;13:e19724. doi: 10.7717/peerj.19724 (PMC12288746; doi:10.7717/peerj.19724)
Supplement: Supplemental Information 3 [file peerj-13-19724-s003.xlsx]

## Sheet: Sheet1
Table S1. The specific primers of SJRL genes.
Primer	Sequence (5'-3')
SlJRL1-F	TTTGGGAAGAAAAAGCAGATGA	qRT-PCR
SlJRL1-R	TCGAACGAACCACTTATAGAAGTAAT
SlJRL2-F	GAAGTTTGCCGCTGAGGTAATG
SlJRL2-R	TTCTCTGAGGCTTTTAACTCTCTTG
SlJRL3-F	AAGTCCTGATGAGTTCCCCAAT
SlJRL3-R	AATACACCATCATCCCAACCTTT
SlJRL4-F	GTCAACGGTGAAGGTTTGGAAT
SlJRL4-R	TGATGACGAATGGCTTGAGATAG
SlJRL5-F	TATGGGAAGAAAATGGACGAAG
SlJRL5-R	CGAAGTAAGAAACTCTGATGGATAAT
SlJRL6-F	AAGGACGAAGGAAGCGAAAT
SlJRL6-R	ACAGGACTACCACCATACACCAC
SlJRL7-F	ATTGGATCATGGTTGGCTCA
SlJRL7-R	GGAATTGTAATAATTGGCATTGGT
SlJRL8-F	GATTTGGTGGCAATGGAGGT
SlJRL8-R	CAATAGCATCGAGGTACGAGTCA
SlEF1a-F	TGTCCCTATTTACGAGGGTTATGC
SlEF1a-R	AGTTAAATCACGACCAGCAAGAT
