# Supplementary material for: Genome-wide characterization and expression analysis of the JRL gene family in response to hormones and abiotic stress in tomato (Solanum lycopersicum L.)
Source: PeerJ. 2025 Jul 21;13:e19724. doi: 10.7717/peerj.19724 (PMC12288746; doi:10.7717/peerj.19724)
Supplement: Supplemental Information 4 [file peerj-13-19724-s004.xlsx]

## Sheet: Sheet1
Supplementary Table S2 The Ka and Ks values of duplicated SlJRL gene pairs.
Duplicated gene pairs	Ka	Ks	Ka/Ks	Duplication type	Types of selection
SlJRL1/4	0.3967	0.7353	0.539508	Tandem duplication	purify selection
SlJRL1/5	0.4124	0.732	0.563388	Tandem duplication	purify selection
SlJRL4/5	0.2096	0.3331	0.62924	Tandem duplication	purify selection
SlJRL3/8	0.2899	0.8918	0.325073	Tandem duplication	purify selection
