# Supplementary material for: Genome-wide characterization and expression analysis of the JRL gene family in response to hormones and abiotic stress in tomato (Solanum lycopersicum L.)
Source: PeerJ. 2025 Jul 21;13:e19724. doi: 10.7717/peerj.19724 (PMC12288746; doi:10.7717/peerj.19724)
Supplement: Supplemental Information 5 [file peerj-13-19724-s005.xlsx]

## Sheet: 新建 文本文档
Table S3 JRL protein sequences used to construct the phylogenetic tree
>SlJRL1
MDMIKIGAIGGRGGSIWEEKADELVGIIVSYDEDVVYSLQFLNYVNGELHMSGKYGTDYYEMNDAIMLDYPSEFITSISGSFERINKKLTDLRSIKFCTNKGSYGPFGTTSTDGKENIHFNFVIGNHQFFGGFHGTENSKGFIGSIVKDVPSSVIKIKDSQVKVKEEK*
>SlJRL2
MRAFLKDVDTRKQKGERVKNCADEIRDLAQDAEGVVEKFAAEVMKRSNGEDTVYCFCTMLANVVKEVIPRYKIGWDIGKINKRVKSLRESLTTYGIVLTDTINEGETSLQSGDTGVGINEGETSIIREVKLESGAIGVERWGGSGGSHWNYRPKGVVKQIVVRHGLIIDAIMFKSIEENGVMKSSKTFGGSGGKLTEINIDSPSEYLTGLSGTYGLYGPYLIIKSIKVHTNLSHHGPMGSVIETDTNFSFIMQGGVIVGFHGFSGLFLDAIGVYVMPTSINLPS*
>SlJRL3
EYHQPSYDQAKLMLIEPWGGSNGSEWNYKLTNPIKEIIIAHDDNVINSIIFRTIGQEGTIDSPKFGGNGGYKKAKVTIENAPEEYLTGIKGKLGYYTGHLVVKSLCFSTNLKCYGPVGGNEVGGTSFSLVIKENGAILGFHGRSGAFLYAIGIYLKNVTPPEQIKLLKQPKVEESPDEFPNKMDVMKGIQPRCPGPWGGYSGKGWDDGVFCTIKQVHIYMNTIISAISGIQIEYEKKDKMSVWSQLHGGFGIGVGNHDNVVKKININDENEFLIGIEGYYSLVKENGGQDTLRQIAFYTNKGKYGPYGSEIGTYFSSSTARGKIVGFHGKSGLFLNAIGVHMEYF*
>SlJRL4
MIKVGAVGNDYGSTWEEKGRGDVAGIFVAYSKDSIQSLQFLLYEDGNFVQSNKHGTHYCANFSAVVFNYPSEFLTSISGSYVNGEGLESIEFTTNKGSYGPFGQTTTYAKHFNFHLGNSNLFGGFHGTVSDSAVESIGIYLKPFVINLKDLRLKDEK*
>SlJRL5
MIKVGPVGSNVGSIWEENGRSEVAGIFVSFTENTIQSLQFLFYENGNYVQSNKHGSDHSENFCALLFDYPSEFLTSISGSYIGDGYLSTGLDAIKFNTNKGCYGPFGRTEPTSSSKRFNFELRNHRLFGGFHGTMSRHAVESIGIYVKPVISSMNYLKGSLRVKAEK*
>SlJRL6
MDWKDEGSEIKKRIVIGSWGGHGGSPWDDGSFNGVREITLVYSLCIDSITVVYDQNGQPYQAEKHGGVGGSRTAQIKLQFPEEYLTSVSGYYCPVVYGGSPVIRSLTFSSNKRKFGPFGVEGGTPFSMPMEGGQIVGFKGRSGWYVDAIGFYIAKVKTTRVLQKAQQSLVKLASSVSMNYKSGDEPKKYSYFYKPTIPKTEA*
>SlJRL7
MENMSFKVETVTSSKLKGTTWEDVDIGDIAMIFISYGRVVSHLQFLYVKDGKFTLSKRHGDTIENLEIIKLDYPSEYLIGINGRHGVLGLDRILKTITFVTNKNSYGPFPKNKPTYMASEDTEFNINALDHGWLNGFHGTICGNQLESFGVYIKPMPIITIPKKDIDYDKIDVTEG*
>SlJRL8
MGNLVSYDEVDQIMVEAWGGIGGLEWNYKFKSPIKEILINHGDVIDSIMFITMNERGDRIESPRFGGNGGRRDKVVIKETSLEFLVGIKGRYGNYKGNLVVKSLSFVTNAKNIYGPFGKEDGTPFSFVIKEGGAIVGLHGLADSYLDAIGVYVNKLTVPKKDEKKLEPNEPIVEEIEIHDKMDVMKTIVPRSAGPWGGCSGKGWDDGVFCTIKQVQVHEALHSSVISAIQIEYENKLDKSSFWSQLHGHEHGAKKTTKINVDGTDEFFIGIEGYYSPLNDNGGQDTIRQITFYTNKGKYGPYGIEIGTYFSSSAARGKIVGFHGKSGLFLNAVGVHMEYF*
>At1g05760
MKIGPVGKHDARSTTIVNWDEGSHDGFISQIFLSHGVAGIMSIQFQFVMDGKLVLSDRHGPFSGNMFDVIELNYPHEYITGISGEYYKYEANNPHMRSLKFNTNTSEYGPFGTSGSSNDKFAFKLGKSPQFGGFHGTYDASGLQYIGVYLRPKTVLPKIDTGNAEETESKIVLG*
>At1g05770
MEGKIKIGPVGTDYSGKKTMVDWDEGSHNGIISQIFLSHGPTGVFSIQFQFMLDDTFFLSSCHGQNTGSMFDVILLNCPHEYITGISGEYLKSDGASGPQIRSLAFATNLNQYGPFGGSSSQSSIWNHEQQFRFKLGKFRQFSGFYGTYNASGLQNIGVYLQPTIVKPTGTRNAEETESNIVLG*
>At1g19715
MSVEGKPASLGPWGGQSGHAWDDGMYTTVKQIIIAHGSGIDSIQIEYDKNGSSVWSEKRGGKGGKKFDKVKFDYPHEYLISVNGTYGSFDVWGTICVRSLTFESNRRKYGPFGVDSGTFFALPKSGSKIIGFHGKAGWYLDAIGVHTQPIPKENNPSSKILLHSHQSFSQGDKKHEYSVLQGSVGQNFDIVVTLRKKDPTLPSFESRDSAGAEVTKHKLVTDTEKSQSKIEGGAKTYGPWGGTGGIMFDDGIYTGIRQINLSRNVGIVSMKVCYDFRGQAVWGSKHGGVGGFKHDKIVFDYPSEVLTHVTGTYGPLMYMGPNVIKSLTFRTNRGKHGPYGEEQGPSFTHQMDEGKVVGFLGREGLFLDSIGVHVMECKISSLKPSSPHNAIVPHNNSGT…
>At1g33790
MAQKLEAKGGKGGNQWDDLLDHDNIAKIHVQGGHEGIQYVKFDYVKFDNLKIGQPKLGSIHGLSRKGFTQTFEIDPTNEHLVSVEGYYDESKGLVQGLKFKTNKKTSDMIGYDENGLKFSLEVNGKKIIGFHGYAQTYLNSLGAYFVTAPPTKFDYQGGSGAQLWDDGTNYNGVRKISFALDANEIRQIRIDYDKGGLIERREYGGNVGRQEEFVVDYPSEYIIYMEGTCDIVSDASKNRVRSLMFKTSKGRTSPIFGKVAARKFVFESNGSALIGFHGRAAAAVDAIGAYFSRFILPPSAETLQAKGGEGGDPWSDGVFNGVRNIYVGQGENGVSAVKFVYDKDSQVAEGNDHGKPTLLGYEEFKLEYPSEYITTVEGCFDKIFGSGGGVITMLKFKT…
>At1g52000
MSWDDGKHTKVKRVQLTFDDVIRSIEVEYDGTSLKSQPRGTAGTKIDGFTLSSDEYITEVNGYYKTTFSGEVITSLTFKTNKRTYGTYGNKTSSYFSVAAPKDNQIVGFLGSSSHALNSIDAHFAPAPPPGSTGAKPGASGIGSDSGSIGSAGTNPGADGTRETEKNAGGSKPSSGSAGTNPGASAVGNGETEKNAGGSKPSSGSAGTNPGASAGGNGETEKNVGGSKPSSGKAGTNPGANAGGNGGTEKNAGGSKSSSGSARTNPGASAGGNGETVSNIGDTESNAGGSKSNDGANNGASGIESNAGSTGTNFGAGGTGGIGDTESDAGGSKTNSGNGGTNDGASGIGSNDGSTGTNPGAGGGTDSNIEGTENNVGGKETNPGASGIGNSDGSTGTSP…
>At1g52030
MSEKVGAMGGNKGGAFDDGVFDGVKKVIVGKDFNNVTYIKVEYEKDGKFEIREHGTNRGQLKEFSVDYPNEYITAVGGSYDTVFGYGSALIKSLLFKTSYGRTSPILGHTTLLGNPAGKEFMLESKYGGKLLGFHGRSGEALDAIGPHFFAVNSSLKHFKPQGGNGGSAWDDGAFDGVRKVLVGRNGKFVSYVRFEYAKGERMVPHAHGKRQEAPQEFVVDYPNEHITSVEGTIDGYLSSLKFTTSKGRTSPVFGNVVGSKFVFEETSFKLVGFCGRSGEAIDALGAHFAPLPAPTPAPAPAPAPAPAPAPSPAPASAPVPAPAPTPAPAPAPPNKVEALGGNGGTIFDDGAFDHVRKVYIGQGDSGVAYVKFEYRKDGKRETREHGKMTVLGTEEFEV…
>At1g52040
MSTGGPQKLEAQGGKEGKEWDDGAEHDGVTKIYVAAGGLGIEQIRFDYVKNGQPKEGSFHGVKGRSTISTIEISHPAEYLISMEGWYDSTNIIQGIQFKSNKHTSQYFGYEFLGDGTQFSLQVNDNKIISFHGFADSHLNSVGAYFAPISSSLTTTPNKVEAQGGNGGETFDDGVFDHVRKVYVGQGESGVAYVKFEYEKDGKRETRDHGKMTLLGTEEFEVDSDDYITSIEVSVDKVFGYNSEIVTALVFKTSKGTTSPPFGMVTEKKFELKDGNGGKLAGFHGKASDVLYALGAYFAPSTTSTTPSTTKKLQARGGNGGASWDDGVFDGVRKILVGQGNDGVAFVTFEYNKGSQAILGDGHGKKTLLGTETFELDYPSEYITSVEGYYDKIFGVEAE…
>At1g52050
MFIIYLFIFLSSAIIDSNGVAMAQKIEAIGGKGGKRWDDGANDNVAKVYIRGDHEGIQYIKFDYVKDGQSFNGSVHGVSADGFTQTFEIDHLQYEQIVSVEGYYDWKTGVMQALQFKTNLKTSEFIGYQKGTKFSLGVDGKVIVGFHGSAWRSLRSLGAYVKTAPTKSELQGGITGGEYWDDGPNFDGVRKVYVTFTETHIRSMNIDYDQDGQVVTRYHGMKNGETQEFAVDFPNEYMTSVEGTYDHISEGNYLVLTSLTFKTSKGRISQTFGLVIGTKFVLETKGNVISGFHGRDGGSFDAIGVYFSPMISS*
>At1g52060
MIFIYIFLFLSSAIIDSNGFAMAQKLEAKGGKGGKEWDDGAGHDNVAKVYIRGGLEGIQYIKFDYVKDGQSVEGSIHGVSGSGFTQMFEIDYQNGEHIVSVDGYFDKSGVMQALEFKTNRKTSEVIGYPKSNTKFSLGGVNGKMINGFHGSAGKALNSIGAYLTKVPPTKSELVGGWGGDYWDDGPNYDGVRKVYVTYMNTCIRSINIDYEKDGQVVTSSHGNKEGETEEFAIDYPNEFLISVEGTYDSILFPDHYVLVITSLSFKTSKGRISPTYGVVSGTKFVLESQGNAIVGFYGRNGGAFDAIGVYFSPI*
>At1g52070
MVIIYIFLFLSSAIIDSTGLAKAQKLDAIGGKGGKQWDDGADHDNVAKVYIRGGLEGIQYIKFDYVKDGKTIDASIHGVSGSGFTQTFEIDYQNSEYIVSVDGYYDKSGTMQALEFKTNLKTSEVIGYPKGTTKFSLGGVNGKMVIGFHGSAGKVLNSIGAYLTTAPPTKSQLVGGLTGGEPWDDGSNYDGVKKISVTYISTLIRSINVDYEKDGQVVTRYHGMKNGDTEEFVIDYPNEYLISVEGTYNILPDDNVLVIRSLIFKTSKGRISPTYGFVSGTKFVLESQGNAIVGFYGRDGGAFDAIGVYFSPIPS*
>At1g52100
MALKVEAKGGKVGIQWDDGSDYHDVTKIYVRGGLEGIQFIKFEYVKAGKKVIGPIHGASGRGFTETFEINNLEKEYLLSIEGYYNASTGVIQCLQFITNKKTYDPIGYNEGARFTLSASRSKIIGFHGFADKYLNSLGAYFIKIPSIQSAIEGAKTTGKGFDDGGDYDGIRKVYVTTDGSAIRHVRFDYDKAGQVETRERGAKTGTQHEFTVNHPYEYITSVEGTYAHTQPYNCVVLTSLTFKTSKGRASPAIGKVTGSKFKLERQGDAIVGFHGRVGSCIDGIGVYYAPLPPSPPPPEKLQGQGGDGGDSWDDGAFKNVKKIYVGQGDVGIAAVKFEYETYTSEVILAERHGKETLLGYEDLNWTIRVSTLQLWKVVTIK*
>At1g52120
MSQDSNALEMIQNEGPKWDDGFDHDDVTKIYLVGGKTGIDFIKIDYVKSGKPKNGPFHGYSGGGFLQMFEIDNLKNEYLESVEGYYTNRSGEFIGAIQFKTNLRVSEIIGYSYWGLKKFKLAKHGNKIIGFQGSAEYRLKDLDAYFTPITPTRMEAQGGNGGTKWDDGGDHDSVTKIQVRINKEGIQYIKFNYVDKDGDPEKEQLHGSETGRGYTLEPFEINHSDKEYLLSIDGCYDEDSGVIQSLQLKTNIKTSEVMGDDEKGTKFTLGCNGHEIIGFHGSAQDNLNALGAYITTLTLTKLEYIGEGSDIWDDGTFEGVKKVSFYHNDGIVRCIEFDYVKDGKIETRVQGGKRGTGDFTKEEFTVDYPNEFLTSVEGTYRDNPGGTLITSLTFKTSNN…
>At1g52130
MTQKLESVGSERKSSEYMWDDGSEHDDVTKIYVRGGTKGIEFIKFGYVKAGELLDGSFHGYSDTGFTQMFEIDHRKNEHLLSVEGYFDYYNDIMYAIQFKTNLKISEIMGYEYSGHKFTLAMEGKKIIGFHGFADVNLRALGAYVTWITPARMEAKGGKGGNEWDDGGDYEAVTKIHGRSDHKGIKDIIFDYVDKDGHPKSETHGPTSGQGYVLEPFEINHLDKEYLMSIDGYYDDASGVIQALQFKTNMKTSELMGYYDDDAVKFTIGCTVNKIIGFHGHAGKNLYSLGAYFTTLPLTKLEYEDSFREKLPKNGASGNLWDDGSFQGVKKVHIYYDGYSVRCVRFDYDDDGKVESREHGPKIVAAVQEGGFVLDYPNEVITSVEGIATVVNTGLSFST…
>At1g57570
MERNLLSILMRRRLAERNRDAIELAAVQKMEVIGSTEGYTFDDGSDHDDVTKIFVGGGRQGIHYIEFEYVKNGQLESGVHLGVRYRGFTETFEINHLNNEHLESVEGYYDYGSGYIQGLQFKTNFRVSELIGYDEGTKFSLSVKGKRIIGFHGYMKERKIISLGGYFSWIHPRKMEAKGSKGGNQWDDGTNNDGVTKIHVRGGVEGIQYIKFDYVRKSGQHINGSIHGLSGSGFTQTFEIDHLNNEHLVCVEGYYDDESGVIQALQFKTNIKTSELLGYKKGKKFSLVDKRKKIVGFHGYADKNLNSLGAYFTTVSPTKSECYGSSKGIYWDDGVFDFIRTVYVSSNVMNVRYIKFHYYNRAVVVRQHGWNSIVEEDGEKEFELDYPNELITSVEGTMK…
>At1g58160
MADKLEAKGGNGGKIWDDGVHEGFDYVKNGQPKAGSTHGVSYHNFTEWFDLNHTCDEHILSVKCYYDDGEIQGLVIKTNIRTSAYMGYNIGTTFTLEVKGKKIVGFHGSFDKNLTSLGAYFAPLSPAK*
>At1g60095
MDRSMFEIDHKKDEQLVSVEGYCKPGSDLIQGVQFKTNLRISEIIGFEKAIFGNPTTFSLAEDGKKIIGFHGYSMANLNSLGAYFTWISPTKMEAKGGKGGTEWNDGAEHEGFTKIYVQGGCDGIQYIKFDYVKDGQHKYGSPHGVKGSESTEPFEINHLDKEYLISVEGYYDEGDSGVIQGIQFKTNIKTSELIGDKKGRKFSLAANGKKIIGFHGYADKNLNSLGAYFTTSPLISLEHTTGSDLVNHIWDDGSFEGVRKVYVRYDSLEICYVEFDYDNKGKVEKREHGMFYSWVQQGEFVVDYPNEFITSVEGTMRTESFMQVASLTFKTSKGRTSSTFGSPSDSKFLLESKGCGVVGFYGRCFSSIFDLGAYFRPLPPPSNTEKVEAKGGDGGASW…
>At1g60110
MAQRLEAEGNKNFKGKSKWDDGSDKDDIGKISVRCEDGGITYIRFDYIKSGQPQYNTFPGNPGRGILQTFDINHKNDEHLESVEGYYDPKSDAIKGLQFKTNMRISELIGYANDGATKFSLAVEGKKIIGFHGAYNTYLNSLGAYVTWIVPTKLKAKGGKGGKEWNDGADHEGITKIYVRGGYEGLQYVKFDYIKDGQQIYGSPHGVRGRGFTELFEINHLDKEYLISVEGYYDEGESGVIQGIQFKTNIRTSELMGDNRGRKFSLAANGKKIIGFHGYAEKNLNSLGAYFTTSPFTKLEVGTTSADLWDDGTFDGIRNVYIHYDGDAVCCVEVDYDNKGKVEKREHGIMIAPFIERGEFVVDYPNEFITSVEVTISKQNDSPVPSLTSETVASLTFKT…
>At1g60130
MSQVFSNLFQMTQRLEAQGQKTLDSPFVWDDGSDHDDVTKIHVRGDSRGINCIRFDYIKSGQRKYKSFYGPSWAGFTQTFKINHKEDEQLESVEGFYKPDSRTIVGLQFKTNLRISELIGHGKKDDTKFSLAVDGKKIIGFHGCSGSYLESLGAYFTCIAPTRMEAKGAKGGTDWNDGADHEGVAKIYVRGGRDCIQYIKFDYVKDRKYIYGPAHGVRGRGFTESFEINHLDNEYMVSVEGYYDEGDSGIIQGIQFRTNIKTSELIGYNNGKKFSLAANGKKIIGFHGYADQNLNSLGAYFTTSPFIKLESRESTGDLWDDGTFEGVRKVCIHKQPVLYSVIQFEYVNRGEVENRDLGLRVFIAEEGEFVVNYPYEFIISVEGTFTNEKDPHVASLTFK…
>At1g73040
MDQQQQGDKNLTVFVGPWGGNGGTTWDDGIYDGVREIRLVYDHCIDSISVIYDKNGKPAKSEKHGGVGGNKTSEIKLQYPEEYLTGVSGYYCPMVNSGTPVIRSMTFKSNKQVYGPYGVEQGTPFTFSVNGGRIVGMNGRSGWYLDSIGFHLSRPKSTKMINKLRKKIHWLTRIVA*
>At2g25980
MAQRLEAKGGKGGNQWDDGADHENVTKIHVRGGLEGIQFIKFEYVKAGQTVVGPIHGVSGKGFTQTFEINHLNGEHVVSVKGCYDNISGVIQALQFETNQRSSEVMGYDDTGTKFTLEISGNKITGFHGSADANLKSLGAYFTPPPPIKQEYQGGTGGSPWDHGIYTGIRKVYVTFSPVSISHIKVDYDKDGKVETRQDGDMLGENRVQGQPNEFVVDYPYEYITSIEVTCDKVSGNTNRVRSLSFKTSKDRTSPTYGRKSERTFVFESKGRALVGLHGRCCWAIDALGAHFGAPPIPPPPPTEKLQGSGGDGGESWDDGAFDGVRKIYVGQGENGIASVKFVYDKNNQLVLGEEHGKHTLLGYEEFELDYPSEYITAVEGYYDKVFGSESSVIVMLKF…
>At2g33070
MVQKVEARGGEIGDVWDDGAYDGVRKVYVGQGEDGIAFVKFEYVNGSQEVVGDERGKKTLLGAEEFEVDPDDYIVYVEGYHEKVFGVTTKEIISTLTFKTYKGKTSPPFGIVSGTKFVLQGGKIVGFHGRSTDVLHSLGAYISSPATPKLRGKWIKVEQKGEGPGPRCSHDIAQVGNKIFSFGGELTPNQPIDKHLYVFDLETRTWSISPATGDVPNLSCLGVRMVSIGSSLYVFGGRDASRKYNGFYSFDTTKNEWKLLTPVEQGPTPRSFHSMTADENNVYVFGGVSATVRLKTLDAYNIVDHKWVQCSTPGGSCSVRGGAGLEVVQGKVWVVYGFNGCEVDDVHCYDPAQDKWTQVETFGEKPCARSVFASAVVGKHILVFGGEIAMDPKAHEGPG…
>At2g39310
MAKMYRKLALCGGEGGQEWDDDVYEGVRKVYVGQDLNRITYIKFEYVQEDGEVVTTEYGTTNQHPKEFVIQYPDEHIIAVEGSYHQVALIATEVITSLVFKTSKGRKSPLFGPNLLGITTGTKFVFEDEGKKIVGFHGRAGDAVDALGVYFVLDTTPFPLYKLDAQGGTDGRVWDDGSYDGIKTLRIDQDNSRITYLEVEYEKDGEAKTCNHGGKGDTPSEFVLGYPDEYIKSVEATYQKPNIFSNTAITSLKFLTSKGRTSFFGYNVGKKFVLEQKGHRLVGFHGKEDAAIDALGAYFGPVPTPTPLIPSKKLPAIGGNEGVTWDDGVYDGVRKILVGQGNDGVSFVKFEYSKGKDLVPGDDHGKKTLLGAEEFVLEDGEYLMNIDGYYDKIFGVEEP…
>At2g39330
MAKIYRKLTGYGGEGGREWDDDVYEGVRKVYVGQDINRITYVKFEYVKEDGQVVTTEYGKIIQQPKEFVLQYPDEHIIAVEGNYRGVALCATEVITNLVFKTSKGRKSPLFGPNLLGITTGTKFVIEDGGKKIVGFHGRSGNALDALGVYFVHGSLTTSPPVYKLDAQGGTDGRVWDDGSYDGVKSLRIGQDNSRITYLEFEYEKGGKLETCRHGVKQERSLKFELNPDEYIKSVEATYDKPDIFRNVVITSLTFETSKGRTSFSGYKGGKKFKLEQKGRRLVGFHGKEGSAIDALGAYFAPIPTPTPIIPAKKLPAIGGSGGVAWDDGVYDGVRKILVGQGNDGVAFVKFEYNKGKDLVSGDDHGKMTLLGTEEFVLEDGEYLTAIDGYYDKIFGVET…
>At2g43730
MKSRNREMFKVGPIGSKQYYDKSWEEKGRNMISSIYVAFNKDSIKCIQFSYFHNGVHVVSEKHGSSKGQSYEIVRLNDDEYVTGLSGIFWERKVTSLTFHTNQGKHGPFCNGTGYSSSYMADYKKEIDVKIRDRREFGGFFGSFDDEFDGLTSIGIYVYPTYDNKPTLNQAWDPLYAFAHNQIPTIADGIPVMHIRYKPKLKDRIFSKLDFKRAMLCLIKVFLD*
>At3g16390
MAQKLVAQGGETGDVWDDGVYDNVTKVYVGQGQYGIAFVKFEYANGSEVVVGDEHGEKTELGVEEFEIDSDDYIVYVEGYREKVSDMTSEMITFLSFKTSKGKTSQPIVKKPGVKFVLHGGKIVGFHGRSTDVLHSLGAYVSLPSTPKLLGNWIKVEQNGEGPGLRCSHGIAQVGNKIYSFGGELIPNQPIDKHLYVFDLETRTWSIAPATGDVPHLSCLGVRMVSVGSTLYTFGGRDFSRQYNGFYSFDTTTNEWKLLTPVEEGPTPRSFHSMAADEENVYVFGGVGAMDRIKTLDSYNIVDKTWFHCSNPGDSFSIRGGAGLEVVQGKVWIVYGFNGCEVDDVHFYDPAEDKWTQVETFGVKPNERSVFASAAIGKHIVIFGGEIAMDPRAHVGPGQ…
>At3g16400
MAQKLEAKGGEMGDVWDDGVYENVRKVYVGQAQYGIAFVKFEYVNGSQVVVGDEHGKKTELGVEEFEIDADDYIVYVEGYREKVNDMTSEMITFLSIKTFKGKTSHPIEKRPGVKFVLHGGKIVGFHGRSTDVLHSLGAYVSLSSTIKLLGKWIKVEQKGEGPGLRCSHGIAQVGNKIYSFGGEFTPNQPIDKHLYVFDLETRTWSISPATGDVPHLSCLGVRMVSVGSTLYVFGGRDASRQYNGFYSFDTTTNEWKLLTPVEEGPTPRSFHSMAADEENVYVFGGVSATARLNTLDSYNIVDKKWFHCSTPGDSLTARGGAGLEVVQGKVWVVYGFNGCEVDDVHYYDPVQDKWTQVETFGVRPSERSVFASAAIGKHIVIFGGEIAMDPLAHVGPGQ…
>At3g16410
MAQKVEAQGGNGGNQWDDGSEYDAVTKIQVAAGGNGIEYVKFTYVKNGQTEEAPLRGVKGRSFEADPFVINHPEEHLVSVEGRYNPEGLILGLTFKSNKKTSDLIGYEDGTPFTLQVQDKKIVGFYGFAGNNLHSLGAYFAPLTNVTPLNAKKLEAKGGDTGDIWDDGVYDNVRKVYVGQAQYGIAFVKFEYVNGSQVVVGDEHGKKTELGVEEFEIDADDYIVYVEGYREKVNGMTSEMITFLSFKTYKGKTSQPIEQRPGIKFVLQGGKIVGFHGRSTDVLDSLGAYISLSPTPNLHGKWTKVDENGDGPGLRCSHDIAQVGNKIYSFGGEFTPNQPIDKHLYVFDIESRTWSISPATGDIPTLSCLGVCMVSIGSTLYVFGGRDASRQYNGFYSFD…
>At3g16420
MAQKVEAQGGKGANLWDDGSTHDAVTKIQLAAGIDGIQYVQFDYVKNGQPEQAPLRGTKGRVLPADPFVINHPDEHLVSVEGWYSPEGIIQGIKFISNKKTSDVIGSDEGTHFTLQVKDKKIIGFHGSAGGNLNSLGAYFAPLTTTTPLTPAKQLTAFGSDDGTVWDDGAYVGVKKVYVGQAQDGISAVKFVYDKSPEEVTGEEHGKSTLLGFEEFVLDYPSEYITAVDGTYDKIFGSDGSVITMLRFKTNKQTSPPFGLEAGTVFELKEEGHKIVGFHGRADVLLHKIGVHVRPLSN*
>At3g16430
MAQKVEAKGGKGGNQWDDGSDHDAVTKIQVAVGGMGIQYIQFDYVKNGQTEQTPLRGIKGSTIPTDPFVINHPEEHLVSIEIWYKPDGLIQGLRFISNKKTSRFIGYDRGTRSFLQVQDKKIIGFHGSAGDNLNSLGAYFAPLTIPLTPAKPLPALGSDDGTAWDDGAYVGVKKVYVGQAQDGISAVKFVYDKSPEEVTGEEHGKSTLLGFEEFVLDYPSEYIIAVEGTYDKIFGSDGSVITMLRFKTNKQTSPPFGLEAGTAFELKEEGHKIVGFHGRADALLHKIGVHVRPVSN*
>At3g16440
MAQKVEAQGGIGGDVWDDGAHDGVRKVHVGQGLDGVSFINVVYENGSQEVVGGEHGKKSLIGIETFEVDADDYIVAVQVTYDKIFGYDSDIITSITFSTFKGKTSPPYGLDTENKFVLKEKNGGKLVGFHGRAGEILYALGAYFTTTTTPLTPAKKLPAVGGDEGTAWDDGAFDGVKKVYIGQAQDGISAVKFVYDKGAEDIVGDEHGNDTLLGFEEFQLDYPSEYITAVEGTYDKIFGFETEVINMLRFKTNKKTSPPFGIEAGTAFELKEEGCKIVGFHGKVSAVLHQFGVHILPVTN*
>At3g16450
MAQKVEAGGGAGGASWDDGVHDGVRKVHVGQGQDGVSSINVVYAKDSQDVEGGEHGKKTLLGFETFEVDADDYIVAVQVTYDNVFGQDSDIITSITFNTFKGKTSPPYGLETQKKFVLKDKNGGKLVGFHGRAGEALYALGAYFATTTTPVTPAKKLSAIGGDEGTAWDDGAYDGVKKVYVGQGQDGISAVKFEYNKGAENIVGGEHGKPTLLGFEEFEIDYPSEYITAVEGTYDKIFGSDGLIITMLRFKTNKQTSAPFGLEAGTAFELKEEGHKIVGFHGKASELLHQFGVHVMPLTN*
>At3g16460
MSWDDGSHAKVKKVQLTFDEIIYSIQVTYDGATALQSQLRGSVGPKSAEFTLAPDEYITALSAYGKSLSTQEVITALTFTTNKTSYGPYGTKSGFQISAPEATGKQISGFLGTSGNVLNTIDVHYSPIPTGGTGTGGTGTGTGTGTGTGTGTGTGTGTGTGTGTGTGGTGTGTGTGTGGTGTGTGTGGTGTGTGTGTGTGTGTGTGTGTGTGGTGTGTGTGGTGTGTGTGTGTGTGTGGTGTGTGTGTGSGAQKLEAQGNSTGGTSWDDGSDYDGVTKIYASYGGEGIQYVKFDYVKGGVTKQGVLHGKQQSRQNPREFVINHPDEYLVSVEGWYETVMLGIQFKTNLNTYEVSIYPFEPSTDTKFTLQVQDKKIIGFHGFAGNHVNSIGAYFVPKSST…
>At3g16470
MAKKLEAQGGRGGEEWDDGGAYENVKKVYVGQGDSGVVYVKFDYEKDGKIVSHEHGKQTLLGTEEFVVDPEDYITSVKIYYEKLFGSPIEIVTALIFKTFKGKTSQPFGLTSGEEAELGGGKIVGFHGSSSDLIHSVGVYIIPSTTPLTPPVSGGLTKLEAQGGRGGDVWDDGGAYDNVKKVYVGQGDSGVVYVKFDYEKDGKIVSLEHGKQTLLGTEEFEIDPEDYITYVKVYYEKLFGSPIEIVTALIFKTFKGKTSQPFGLTSGEEAELGGGKIVGFHGTSSDLIHSLGAYIIPSSTPLTPSSNTIPAQGGDGGVAWDDGVHDSVKKIYVGQGDSCVTYFKADYEKASKPVLGSDHGKKTLLGAEEFVLGPDEYVTAVSGYYDKIFSVDAPAIVSL…
>At3g21380
MAAATMSWDDGKHMKVKRVQITYEDVINSIEAEYDGDTHNPHHHGTPGKKSDGVSLSPDEYITDVTGYYKTTGAEDAIAALAFKTNKTEYGPYGNKTRNQFSIHAPKDNQIAGFQGISSNVLNSIDVHFAPLPSSSSSSSSLSQANKVDAQGGKGGTSWDDGAHDHVRRVYIGQGDSGVTYVKFEYEKDDKKESREHGKKTLLGAEVFEVDPDDYITSVEVQSDRIFGQDTEVITSLIFKTSKGKFSPPFGLEGSQKYELKDKNGGKLVGFHGRVGGELLNALGAYFAPSSGRGTPSATQPPGSAQPTGSAGAKKLEAKGGNVGNPWDDGPHEGVRKVYIGQGDSGVSYVKFVYDKDSKEVPGNDHGKRTLLAPEEFLLEYPNEYITSVELNYDKIFGT…
>At3g59590
MELSFKREKICSVEVNLDVPSIEVHSHNLPSYIPGYNGFFMTVEYCDGLVVYATENGIGICNPLLRQIRWIKSKVNYRYNGVGYDNSRPENHYKIFESCPYSDTTVKASITEFVSDAWISKPYEFAYDWDFMSSYSVSLNGALYWVAFHMASDDQFIQSFDFSTEKFEPYCLLPNKKCDPSNARSLAVFRGDRFSYLEQNYETRNIEIWVTKKEIKIENGKAVEWMNLMKVSVPKWSSLREKACIYIAKGDKFHEIIINDLVEYPTRHHRTYVPSLVPVPTFTMSNRSKTQQVESRFTPPRGIQASDGGNEWDDGIFHNVKKINVGVNDFDTVFVKFHYSKYNRIEAGAGHGNATTHNPDDEIMIAGGDYIEAVEGTYTESHITSITFRMRKGDMMPQY…
>At3g59610
MMQPDHDLPYDLEGEILSHLPIQILARFRCVCKRWNTLFKERRFFNSDLGLARPQFILLAESKICSVDVNLDGPSIEVHNLPSDIPGYKLYMPMHVEYCDGLFLYATCYGIGICNPWLRQIRWFKSSYEGYDFSGMGYDNSRQDKHYKILGSYCTNTTMNASVTELGSDAWKSYEFAFHSWNLSMSPYSVSLNGNLYWVAYNHESRDYFIQSFDFSTVSFKHYCILPTKNGHRQCDGRSLAIFREDRFSFLEQEIYNTRNIEIWVTKETIKNGDGEAVEWVNLMSVLVPEWSSLSVNYYPPSYFVDEDKVGLTLVICCYNKEGKAYIYIAKGDKFHEIEIKDLVEYNPRHRTYFPNLIQVPTFTMSGRSITQHQVESRFAPLRGIQVSVGVGGDEWDDG…
>At3g59620
MAFRMSRDHADFVAHGGTEWDDGAFVNVKKIKIFHDWAGITLVQFDYIDGTGAIVSGLDHGTEPFQFDREHGRVPVEGARAEFWLRDDEYITIVTAFGGYCVRKIEFITNKRTFDFGGFN*
>At5g28520
MAQKLEAIGRGLQWDDSSDHDNVTKILVRGGREGIQYVKFDYVKSGQPQTGLIHGLSGRGGFTQTFEIDQKDEHLVSVEGYYDVTKGVIQALKFKTNKKTSEMIGYDDTGIKLSLEVKGKKIIGFHGYAETNLNSLGAYFTTTGPIGLNPQVGHIKLAYQGGGGGIPWDHGPNHNGVKRVSFIFDENEIRQWRVDYDDGGVIRQYEPINGYDMFEVKEYPTEYIISVECTYDDVIPRSGRRMIRSIMFKTSKGRVSPIFGYPAARKFVLENNGGALIGFHGRVGAGIDALGAYFSSFIPSPPPPSPEKLQPEGGEAVGDPWDDGIFNGVREIHLEDGEGIALKFVYDKDVQVTELKVHGEPSGIGFNEFKLDYPSEYITTVEGFWDKTSGNERGVITRL…
>At5g35940
MALMVNAKGGNGGKEWDDGFDYEGVTKIHVRAGSEGIQFIKFDYVKVGKTIDGPIHGVSGLGMTQTFEINHLQKEYLVSIEGYYDKSTGVIQSIQFKTNVKTSDMMGFNKGTKFSLGIIRNKIIGFHGFSDKNVYSLGAYFIKVLATKSGMQGGQNTGKSYDYGGDYDGIRKVYVTYDGTSIRHMRVDYDKAGQVECYEYGDKTGTQYKITVNYPYECITSVEGSYANTQPYGCIVLRSLTFKTSNGRTLVIGTVTGTKFLLESKGNAIVGFHGRVGSCVDSIGAYYAPFSPSPPPTQKLEGQGGDGGDSWDDGAFLNVKKVYIGQGSNGIVAVKFEYENDASEVVVGDEHGKTTLLGYEVFELDYPNEYITSLEGCHDKVMGAETGVITMLRFKTNKR…
>At5g35950
MALMVKAEGGNGGKRWDDGFDYEGVTKIYVRGGLEGIQFIKFDYVKDGKTITGPIHGVSGRGLTQTFEINHLQKEYLLSIEGYYDISTGVIQSIQFKTNQQTSDMMGFNEGTKFSLRSMRGRIIGFHGFADKNLYSLRAYYIRIPATKSAMDGGQNTGRGYDHGGDYDGVRKVYVTFDGTSIRNMRVDYDKVGQVECYEYGVKIGTQNQFTINYPYECITSVGGSYADTQPYRCIVLRSLTFKTSNGRTSVFGKETGTTFLLESQGNAIVGFHGRVGSCVDSIGEYYAPFSPYPPPTEKLEGQGGDGGDSWDDGAFLNVKKVCIGQGQFGIVSVKFEYENDASEVVVGDEHGKATLLGYEEFELDYPSEYITSVEACQDKVMGAETGVLTMLRFKTNIR…
>At5g38540
MLIYNADSVVFLFSLFLQFEINHLQDEHLESVDAYYNKKSYGLQAIQFKTNFRTSELMGYSYECTMFTLAVKGKKIIGFHGSDNVHIYSLGAYFTSITPTRLEVKGGMGGKKWEDGFDHDNVSKIQVLGGFEGILYIKVDYIKNGKLETGLIHGDSGGDGFLQKMEINQSKNEYLVYVEGYYDDASETIQGLHFQTNLNNPVMMGYKKGRKFLLASNGNKIIGFHGYADKSLNSLGAYFSRATPNKLECQGDCRGMSWDDGCNYDGVRKVFVDGIGNEIYTVRFEYDNGGKVEKTPYRRDVKNEKEFVLDYPNEFITSVEGTLAAPKSVNITWITSLTFKTSKKRSSPTFGSASSRKFVLEKNGSPLVGFHGYNSVGNTLNSLGAYYRPIPPTPDVEKL…
>At5g38550
MIQKLGAKGIKSDERNQREWDDGSEHDDVTKIYVRGGREGIRSIYFNYVKNGKPKDGSIHGYFDSGFTQTFEINHLRGEYLESVDAYYDKKSYGMQAIQFKTNFRTSELMGYSYECTMFTLAVQGKKIIGFHGSNYVHILSLGAYFISIAPTRLEVKGSKGSKKWDDGFDHENVSKIEVLGGFEGILYIKVDYIKNGKLETGLVHGHSGGDGFLQKMEINQSKNEYLVYVEGYYDDASETIQGLHFQTNLNNPVMMGYKKGRKFLLASNGNKIIGFHGYADKSLNSLGAYFSTTTPNKLECQGDRKGLPWDDGCNYDGVKKVYVDSISDIDSVRFEYDNGGKVEKTPYRRDVTNEKEFVLDYPNEFITSVEGTLATPTNFDITWILSLTFKTSKGRTSP…
>At5g46000
MSKKVTIAYGGSNGNKFDDGVYEGTYDGVRKLIVGEDFHGIVYLKIQYVKNGDVVVKEHGRARGTHITETEFEVKCPDEYITSIWGTCRNDHHRYKSTGGRTFEQLTAADKYDINLAAKMGTPMYWNTVSELQFKTSHGRTSEQFRMPGTGGSNGVSWDDGAYDRLSKLCVGEDAHCVSSVEFHYVKGNDRITHCHGKDSKEHDKDGFISSLTFKTSMNRSSEKFGKPVGTKFQLEAKGFDKIVGFRGRSSVNRINALGANFAVVVVPPVKKLNAKGGVLGNEWDDGIHDDARMITFKLYFNKEYITSVEGHYGKRLAAPNASASAMSSFFTGYMTMLKFNTNRTTYQVLSHSPEYTYEGTSFKLEEKDHKIVGFYGKTEVSLNQIGVYVKPIANA*
>At5g49850
MTERSEALGKDGNRRWDDKSDHDDVTKIYVNYSLMGIESIRFDYVKSGKPIEGPFRGETYNTYTHTFEINHLKNEHLESVEGSYTQRGIQTLQFKTNLRISEPIGYPGKDGIKFILAVEGKKIIGFHGSTYFRLYSLGAYFTRVTPTRIEAIGGKVGTKWDDGVDQAGFTKIHVRSGQEGIQFIKFEYVDKNGRLRDGSIHGSIYRRGSPHVFEIRHVDKEYLVSVEGYYDGDGDCAVIQALRFRTNVKTSQLMGPKTGKKFRLAASGMKIVGFHGYAEKNLTSLGGYFTPIIPTKSECQGVTERSTLWDSGAFEGIRKVSVTWRSYCIRCFRINYENDGKVVKRAHGMNDDSRITDEFVVDYPYEVITSIVGTMNDSYVTSFVFKTSKGRTSRTFGER…
>At5g49860
MDSNVITSLTFKTSKGRTSPKFGYGTSDSVEFVLESKGCAIVGFYGWYKTGSGYTTALGAYYYPMPLPPSSEKLEAQGGAGGAPWDDGSNFEGVRKIYIGTGEIGIVSIKFLYENDIHEIIVGDHHGNKNLLRHEEFDLDYPSEYLTSVEGSYDVVPGSEEDEVMIMLKFTTNMRTSPCYGLDDDPSFVLHKEGHKIVGFHGKSSTMLHKLGIHVLPITHS*
>At5g49870
MTERLEAEGSRRGNNSKWDDKSDHDDVTKIYVNYSLSGIESIRFDYVKSGKPKDGPFRGQSYNTYTHTFEINHLKYEHLESVEGYYTEDTGIEALQFKTNLRISEPIGYHHDGCTKFILAVEGKKIIGFHGSSFALRVGSLGAYFTWDTPTIIKAVGGKVGTKWDDGVNQAGFTKIHVRSGQKGIQFIKLEYVDKDGNLTDGPIHGSIYRRGSPHVFEFKHDEEYLVSVEGYYEGDEECEVIQGLQFRTNIKTSELMGSNTGKKFKLTASGMKIVGFHGYAEKNLSSLGAYLTPLTPKKSECKGITDGSNVWNWDDGAFEGIRKVSVFFTALRIRCLMINYEDAGKVVKRSHGLNNNDHQEEKFVVDYPNEFITSVVGTMSSSSVMPLIFKTSKGRTSK…
