# Supplementary material for: Genome-wide characterization and expression analysis of the JRL gene family in response to hormones and abiotic stress in tomato (Solanum lycopersicum L.)
Source: PeerJ. 2025 Jul 21;13:e19724. doi: 10.7717/peerj.19724 (PMC12288746; doi:10.7717/peerj.19724)
Supplement: Supplemental Information 7 [file peerj-13-19724-s007.xlsx]

## Sheet: Sheet1
Supplementary File 1. Raw data of SlJRLs expressions at different development stages of tomato for data analyses and preparation for Figure 6.
Gene Name	Sample Name	Cт	∆CT	∆∆CT	2-∆∆CT	Average (2-∆∆CT)	Asterisk
SlJRL-02	Roots-Re1	36.195	9.21567	-0.063	1.04464	1.0009
	Roots-Re2	36.238	9.25867	-0.02	1.01396
	Roots-Re3	36.341	9.36167	0.083	0.944092
	Stems-Re1	32.853	6.17833	-3.10033	8.57617	8.37424	***
	Stems-Re2	33.363	6.28833	-2.99033	7.94658
	Stems-Re3	33.249	6.17433	-3.10433	8.59998
	leaves-Re1	33.784	9.28733	0.00866667	0.994011	0.881503
	leaves-Re2	33.998	9.50133	0.222667	0.85698
	leaves-Re3	34.109	9.61233	0.333667	0.793517
	flowers-Re1	35.87	8.995	-0.283667	1.21728	1.23902
	flowers-Re2	35.93	9.055	-0.223667	1.1677
	flowers-Re3	35.74	8.865	-0.413667	1.33207
	ripening fruits-Re1	36.533	8.02533	-1.25333	2.38392	2.65729	***
	ripening fruits-Re2	36.24	7.73233	-1.54633	2.92074
	ripening fruits-Re3	36.371	7.86333	-1.41533	2.66721
SlJRL-04	Roots-Re1	27.67	2.18267	0.150667	0.900834	1.00371
	Roots-Re2	27.522	2.03467	0.00266667	0.998153
	Roots-Re3	27.366	1.87867	-0.153333	1.11214
	Stems-Re1	26.32	1.95533	-0.0766667	1.05458	1.0493
	Stems-Re2	26.429	2.06433	0.0323333	0.977838
	Stems-Re3	26.239	1.87433	-0.157667	1.11548
	leaves-Re1	32.591	6.89067	4.85867	0.0344664	0.0390261	***
	leaves-Re2	32.047	6.34667	4.31467	0.0502523
	leaves-Re3	32.682	6.98167	4.94967	0.0323595
	flowers-Re1	32.471	1.584	-0.448	1.36415	1.26945	*
	flowers-Re2	32.516	1.629	-0.403	1.32225
	flowers-Re3	32.753	1.866	-0.166	1.12194
	ripening fruits-Re1	27.242	2.88933	0.857333	0.551972	0.538976	**
	ripening fruits-Re2	27.252	2.89933	0.867333	0.548159
	ripening fruits-Re3	27.337	2.98433	0.952333	0.516796
SlJRL-05	Roots-Re1	35.795	10.3077	0.344667	0.78749	1.0191
	Roots-Re2	35.106	9.61867	-0.344333	1.26956
	Roots-Re3	35.45	9.96267	-0.000333333	1.00023
	Stems-Re1	28.207	3.84233	-6.12067	69.5832	64.3639	***
	Stems-Re2	28.409	4.04433	-5.91867	60.4918
	Stems-Re3	28.35	3.98533	-5.97767	63.0169
	leaves-Re1	31.135	5.584	-4.379	20.807	18.4409	**
	leaves-Re2	31.428	5.877	-4.086	16.9828
	leaves-Re3	31.382	5.831	-4.132	17.533
	flowers-Re1	35.564	4.677	-5.286	39.0162	34.7486	***
	flowers-Re2	35.876	4.989	-4.974	31.4285
	flowers-Re3	35.771	4.884	-5.079	33.8011
	ripening fruits-Re1	29.475	5.12233	-4.84067	28.654	32.1624	***
	ripening fruits-Re2	29.279	4.92633	-5.03667	32.8237
	ripening fruits-Re3	29.186	4.83333	-5.12967	35.0093
SlJRL-06	Roots-Re1	34.264	7.914	-0.107	1.07699	1.00203
	Roots-Re2	34.489	8.139	0.118	0.921464
	Roots-Re3	34.36	8.01	-0.011	1.00765
	Stems-Re1	30.507	6.14233	-1.87867	3.67735	3.54454	***
	Stems-Re2	30.531	6.16633	-1.85467	3.61668
	Stems-Re3	30.646	6.28133	-1.73967	3.33958
	leaves-Re1	33.473	7.64833	-0.372667	1.29474	1.32173
	leaves-Re2	33.663	7.83833	-0.182667	1.13498
	leaves-Re3	33.227	7.40233	-0.618667	1.53546
	flowers-Re1	37.494	11.6987	3.67767	0.0781469	0.0787353	**
	flowers-Re2	37.256	11.4607	3.43967	0.0921631
	flowers-Re3	37.74	11.9447	3.92367	0.0658959
	ripening fruits-Re1	31.951	7.59833	-0.422667	1.3404	1.12199
	ripening fruits-Re2	32.263	7.91033	-0.110667	1.07973
	ripening fruits-Re3	32.454	8.10133	0.0803333	0.945839
SlJRL-07	Roots-Re1	29.344	2.36467	0.0116667	0.991946	1.00231
	Roots-Re2	29.446	2.46667	0.113667	0.924236
	Roots-Re3	29.207	2.22767	-0.125333	1.09076
	Stems-Re1	25.242	-1.83267	-4.18567	18.1975	19.4214	***
	Stems-Re2	24.976	-2.09867	-4.45167	21.8819
	Stems-Re3	25.243	-1.83167	-4.18467	18.1849
	leaves-Re1	29.287	3.92733	1.57433	0.335798	0.302671
	leaves-Re2	29.163	3.80333	1.45033	0.365937
	leaves-Re3	29.99	4.63033	2.27733	0.206279
	flowers-Re1	35.767	3.74333	1.39033	0.381477	0.344534
	flowers-Re2	35.928	3.90433	1.55133	0.341195
	flowers-Re3	36.062	4.03833	1.68533	0.310931
	ripening fruits-Re1	30.53	2.02233	-0.330667	1.25759	1.24415
	ripening fruits-Re2	30.496	1.98833	-0.364667	1.28758
	ripening fruits-Re3	30.613	2.10533	-0.247667	1.18729
SlJRL-08	Roots-Re1	36.529	9.54967	0.201	0.869947	1.0123
	Roots-Re2	36.018	9.03867	-0.31	1.23971
	Roots-Re3	36.437	9.45767	0.109	0.927231
	Stems-Re1	32.564	5.48933	-3.85933	14.5136	15.5961
	Stems-Re2	32.198	5.12333	-4.22533	18.7048
	Stems-Re3	32.661	5.58633	-3.76233	13.5699
	leaves-Re1	33.277	2.46167	-6.887	118.357	129.427	***
	leaves-Re2	33.252	2.43667	-6.912	120.426
	leaves-Re3	32.94	2.12467	-7.224	149.5
	flowers-Re1	34.473	2.44933	-6.89933	119.373	112.784	***
	flowers-Re2	34.739	2.71533	-6.63333	99.2733
	flowers-Re3	34.469	2.44533	-6.90333	119.704
	ripening fruits-Re1	31.616	3.10833	-6.24033	75.601	69.8111	***
	ripening fruits-Re2	31.662	3.15433	-6.19433	73.2285
	ripening fruits-Re3	31.935	3.42733	-5.92133	60.6037
SlActin	Roots-JRL2-Re1	26.645
	Roots-JRL2-Re2	27.444
	Roots-JRL2-Re3	26.849
	Stems-JRL2-Re1	27.071
	Stems-JRL2-Re2	26.742
	Stems-JRL2-Re3	27.411
	leaves-JRL2-Re1	24.326
	leaves-JRL2-Re2	24.652
	leaves-JRL2-Re3	24.512
	flowers-JRL2-Re1	26.707
	flowers-JRL2-Re2	26.842
	flowers-JRL2-Re3	27.076
	ripening fruits-JRL2-Re1	28.322
	ripening fruits-JRL2-Re2	28.39
	ripening fruits-JRL2-Re3	28.811
	Roots-JRL4-Re1	25.402
	Roots-JRL4-Re2	25.375
	Roots-JRL4-Re3	25.685
	Stems-JRL4-Re1	24.289
	Stems-JRL4-Re2	24.418
	Stems-JRL4-Re3	24.387
	leaves-JRL4-Re1	25.835
	leaves-JRL4-Re2	25.433
	leaves-JRL4-Re3	25.833
	flowers-JRL4-Re1	30.914
	flowers-JRL4-Re2	30.979
	flowers-JRL4-Re3	30.768
	fruits-JRL4-Re1	24.409
	fruits-JRL4-Re2	24.257
	fruits-JRL4-Re3	24.392
	Roots-JRL5-Re1	25.402
	Roots-JRL5-Re2	25.375
	Roots-JRL5-Re3	25.685
	Stems-JRL5-Re1	24.289
	Stems-JRL5-Re2	24.418
	Stems-JRL5-Re3	24.387
	leaves-JRL5-Re1	25.412
	leaves-JRL5-Re2	25.48
	leaves-JRL5-Re3	25.761
	flowers-JRL5-Re1	30.914
	flowers-JRL5-Re2	30.979
	flowers-JRL5-Re3	30.768
	ripening fruits-JRL5-Re1	24.409
	ripening fruits-JRL5-Re2	24.257
	ripening fruits-JRL5-Re3	24.392
	Roots-JRL6-Re1	26.319
	Roots-JRL6-Re2	26.495
	Roots-JRL6-Re3	26.236
	Stems-JRL6-Re1	24.289
	Stems-JRL6-Re2	24.418
	Stems-JRL6-Re3	24.387
	leaves-JRL6-Re1	25.89
	leaves-JRL6-Re2	25.614
	leaves-JRL6-Re3	25.97
	flowers-JRL6-Re1	25.829
	flowers-JRL6-Re2	25.745
	flowers-JRL6-Re3	25.812
	ripening fruits-JRL6-Re1	24.409
	ripening fruits-JRL6-Re2	24.257
	ripening fruits-JRL6-Re3	24.392
	Roots-JRL7-Re1	26.645
	Roots-JRL7-Re2	27.444
	Roots-JRL7-Re3	26.849
	Stems-JRL7-Re1	27.071
	Stems-JRL7-Re2	26.742
	Stems-JRL7-Re3	27.411
	leaves-JRL7-Re1	25.063
	leaves-JRL7-Re2	25.498
	leaves-JRL7-Re3	25.518
	flowers-JRL7-Re1	32.063
	flowers-JRL7-Re2	32.146
	flowers-JRL7-Re3	31.862
	ripening fruits-JRL7-Re1	28.322
	ripening fruits-JRL7-Re2	28.39
	ripening fruits-JRL7-Re3	28.811
	Roots-JRL8-Re1	26.645
	Roots-JRL8-Re2	27.444
	Roots-JRL8-Re3	26.849
	Stems-JRL8-Re1	27.071
	Stems-JRL8-Re2	26.742
	Stems-JRL8-Re3	27.411
	leaves-JRL8-Re1	30.776
	leaves-JRL8-Re2	30.608
	leaves-JRL8-Re3	31.062
	flowers-JRL8-Re1	32.063
	flowers-JRL8-Re2	32.146
	flowers-JRL8-Re3	31.862
	ripening fruits-JRL8-Re1	28.322
	ripening fruits-JRL8-Re2	28.39
	ripening fruits-JRL8-Re3	28.811
