# Supplementary material for: Genome-wide characterization and expression analysis of the JRL gene family in response to hormones and abiotic stress in tomato (Solanum lycopersicum L.)
Source: PeerJ. 2025 Jul 21;13:e19724. doi: 10.7717/peerj.19724 (PMC12288746; doi:10.7717/peerj.19724)
Supplement: Supplemental Information 8 [file peerj-13-19724-s008.xlsx]

## Sheet: Sheet1
Supplementary File 2. Raw data of SlJRLs expressions under different treatment for data analyses and preparation for Figure 7.
Gene Name	Sample Name	Cт	∆CT	∆∆CT	2-∆∆CT	Average (2-∆∆CT)	Asterisk
SlJRL-02	SA-0h-Re1	33.784	9.28733	-0.179667	1.13262	1.00443
	SA-0h-Re2	33.998	9.50133	0.0343333	0.976483
	SA-0h-Re3	34.109	9.61233	0.145333	0.90417
	SA-1.5h-Re1	36.738	8.30133	-1.16567	2.24337	2.33537	***
	SA-1.5h-Re2	36.785	8.34833	-1.11867	2.17146
	SA-1.5h-Re3	36.53	8.09333	-1.37367	2.59128
	SA-3h-Re1	30.052	8.17267	-1.29433	2.45264	2.7722	***
	SA-3h-Re2	29.783	7.90367	-1.56333	2.95536
	SA-3h-Re3	29.806	7.92667	-1.54033	2.90862
	SA-9h-Re1	33.88	13.2777	3.81067	0.0712648	0.110739	*
	SA-9h-Re2	33.086	12.4837	3.01667	0.123564
	SA-9h-Re3	32.933	12.3307	2.86367	0.137389
	SA-12h-Re1	35.741	7.858	-1.609	3.0504	2.89038	***
	SA-12h-Re2	35.731	7.848	-1.619	3.07162
	SA-12h-Re3	36	8.117	-1.35	2.54912
	SA-24h-Re1	34.261	12.157	2.69	0.154963	0.127607	***
	SA-24h-Re2	34.547	12.443	2.976	0.127097
	SA-24h-Re3	34.882	12.778	3.311	0.10076
	MeJA-0h-Re1	33.784	9.28733	-0.179667	1.13262	1.00443
	MeJA-0h-Re2	33.998	9.50133	0.0343333	0.976483
	MeJA-0h-Re3	34.109	9.61233	0.145333	0.90417
	MeJA-1.5h-Re1	29.708	10.5563	1.08933	0.469979	0.425098
	MeJA-1.5h-Re2	29.895	10.7433	1.27633	0.412843
	MeJA-1.5h-Re3	29.968	10.8163	1.34933	0.392473
	MeJA-3h-Re1	37.164	5.22067	-4.24633	18.979	16.704	***
	MeJA-3h-Re2	37.385	5.44167	-4.02533	16.2834
	MeJA-3h-Re3	37.518	5.57467	-3.89233	14.8494
	MeJA-9h-Re1	34.475	11.3237	1.85667	0.276114	0.289706
	MeJA-9h-Re2	34.755	11.6037	2.13667	0.227405
	MeJA-9h-Re3	34.07	10.9187	1.45167	0.365599
	MeJA-12h-Re1	33.843	3.66333	-5.80367	55.857	54.8121	***
	MeJA-12h-Re2	33.849	3.66933	-5.79767	55.6252
	MeJA-12h-Re3	33.92	3.74033	-5.72667	52.954
	MeJA-24h-Re1	30.107	8.555	-0.912	1.88165	1.66917
	MeJA-24h-Re2	30.422	8.87	-0.597	1.51257
	MeJA-24h-Re3	30.329	8.777	-0.69	1.61328
	ABA-0h-Re1	33.784	9.28733	-0.179667	1.13262	1.00443
	ABA-0h-Re2	33.998	9.50133	0.0343333	0.976483
	ABA-0h-Re3	34.109	9.61233	0.145333	0.90417
	ABA-1.5h-Re1	36.216	13.725	4.258	0.0522654	0.0455859
	ABA-1.5h-Re2	36.487	13.996	4.529	0.0433147
	ABA-1.5h-Re3	36.56	14.069	4.602	0.0411775
	ABA-3h-Re1	35.927	10.2157	0.748667	0.595153	0.551563
	ABA-3h-Re2	36.054	10.3427	0.875667	0.545002
	ABA-3h-Re3	36.137	10.4257	0.958667	0.514532
	ABA-9h-Re1	33.405	10.9993	1.53233	0.345718	0.350033
	ABA-9h-Re2	33.22	10.8143	1.34733	0.393018
	ABA-9h-Re3	33.556	11.1503	1.68333	0.311362
	ABA-12h-Re1	36.351	4.153	-5.314	39.7808	37.479	***
	ABA-12h-Re2	36.489	4.291	-5.176	36.1519
	ABA-12h-Re3	36.475	4.277	-5.19	36.5044
	ABA-24h-Re1	36.856	13.415	3.948	0.0647938	0.069783
	ABA-24h-Re2	36.675	13.234	3.767	0.0734548
	ABA-24h-Re3	36.722	13.281	3.814	0.0711003
SlJRL-04	SA-0h-Re1	32.591	6.89067	6.89067	0.00842758	0.00954249
	SA-0h-Re2	32.047	6.34667	6.34667	0.0122875
	SA-0h-Re3	32.682	6.98167	6.98167	0.00791241
	SA-1.5h-Re1	28.954	0.517333	0.517333	0.698662	0.760202	***
	SA-1.5h-Re2	28.863	0.426333	0.426333	0.744151
	SA-1.5h-Re3	28.692	0.255333	0.255333	0.837794
	SA-3h-Re1	24.581	2.70167	2.70167	0.153715	0.15891	***
	SA-3h-Re2	24.603	2.72367	2.72367	0.151389
	SA-3h-Re3	24.422	2.54267	2.54267	0.171625
	SA-9h-Re1	28.103	7.50067	7.50067	0.00552172	0.00487341
	SA-9h-Re2	28.376	7.77367	7.77367	0.00456976
	SA-9h-Re3	28.389	7.78667	7.78667	0.00452876
	SA-12h-Re1	32.607	1.28867	1.28867	0.409329	0.374255	***
	SA-12h-Re2	32.798	1.47967	1.47967	0.358572
	SA-12h-Re3	32.813	1.49467	1.49467	0.354863
	SA-24h-Re1	29.79	7.686	7.686	0.00485605	0.00382782
	SA-24h-Re2	30.363	8.259	8.259	0.00326432
	SA-24h-Re3	30.32	8.216	8.216	0.00336308
	MeJA-0h-Re1	32.591	6.89067	0.151	0.900626	1.01977
	MeJA-0h-Re2	32.047	6.34667	-0.393	1.31312
	MeJA-0h-Re3	32.682	6.98167	0.242	0.845572
	MeJA-1.5h-Re1	28.292	2.36267	-4.377	20.7782	19.3441	***
	MeJA-1.5h-Re2	28.379	2.44967	-4.29	19.5622
	MeJA-1.5h-Re3	28.524	2.59467	-4.145	17.6917
	MeJA-3h-Re1	35.028	3.08467	-3.655	12.5969	12.1314	*
	MeJA-3h-Re2	35.136	3.19267	-3.547	11.6884
	MeJA-3h-Re3	35.085	3.14167	-3.598	12.1089
	MeJA-9h-Re1	32.268	0.602333	-6.13733	70.3917	67.1744	***
	MeJA-9h-Re2	32.381	0.715333	-6.02433	65.0886
	MeJA-9h-Re3	32.36	0.694333	-6.04533	66.043
	MeJA-12h-Re1	32.21	1.897	-4.84267	28.6938	28.3774	***
	MeJA-12h-Re2	32.48	2.167	-4.57267	23.7963
	MeJA-12h-Re3	32.024	1.711	-5.02867	32.6422
	MeJA-24h-Re1	26.641	5.089	-1.65067	3.13979	2.90468
	MeJA-24h-Re2	26.831	5.279	-1.46067	2.75236
	MeJA-24h-Re3	26.795	5.243	-1.49667	2.8219
	ABA-0h-Re1	32.591	6.89067	0.151	0.900626	1.01977
	ABA-0h-Re2	32.047	6.34667	-0.393	1.31312
	ABA-0h-Re3	32.682	6.98167	0.242	0.845572
	ABA-1.5h-Re1	25.267	2.776	-3.96367	15.6021	15.7149	***
	ABA-1.5h-Re2	25.238	2.747	-3.99267	15.9189
	ABA-1.5h-Re3	25.265	2.774	-3.96567	15.6237
	ABA-3h-Re1	29.393	3.68167	-3.058	8.32817	9.33813	***
	ABA-3h-Re2	29.047	3.33567	-3.404	10.5854
	ABA-3h-Re3	29.265	3.55367	-3.186	9.10084
	ABA-9h-Re1	26.626	4.22033	-2.51933	5.73317	5.23563	***
	ABA-9h-Re2	26.61	4.20433	-2.53533	5.79711
	ABA-9h-Re3	27.083	4.67733	-2.06233	4.17661
	ABA-12h-Re1	38.965	7.46467	0.725	0.604997	0.683275
	ABA-12h-Re2	39.006	7.50567	0.766	0.588046
	ABA-12h-Re3	38.463	6.96267	0.223	0.856782
	ABA-24h-Re1	31.746	8.17167	1.432	0.370617	0.374416
	ABA-24h-Re2	31.73	8.15567	1.416	0.37475
	ABA-24h-Re3	31.718	8.14367	1.404	0.37788
SlJRL-05	SA-0h-Re1	31.135	5.584	-0.18	1.13288	1.00406
	SA-0h-Re2	31.428	5.877	0.113	0.924663
	SA-0h-Re3	31.382	5.831	0.067	0.954621
	SA-1.5h-Re1	34.751	6.31433	0.550333	0.682862	0.767319
	SA-1.5h-Re2	34.331	5.89433	0.130333	0.91362
	SA-1.5h-Re3	34.704	6.26733	0.503333	0.705475
	SA-3h-Re1	25.571	3.69167	-2.07233	4.20566	4.07799	***
	SA-3h-Re2	25.666	3.78667	-1.97733	3.93765
	SA-3h-Re3	25.611	3.73167	-2.03233	4.09066
	SA-9h-Re1	36.894	1.996	-3.768	13.6233	13.1739	***
	SA-9h-Re2	37.041	2.143	-3.621	12.3035
	SA-9h-Re3	36.897	1.999	-3.765	13.595
	SA-12h-Re1	38.643	5.019	-0.745	1.67597	1.68168
	SA-12h-Re2	38.534	4.91	-0.854	1.80751
	SA-12h-Re3	38.745	5.121	-0.643	1.56157
	SA-24h-Re1	39.654	3.61533	-2.14867	4.43418	5.02742	***
	SA-24h-Re2	39.261	3.22233	-2.54167	5.82261
	SA-24h-Re3	39.532	3.49333	-2.27067	4.82546
	MeJA-0h-Re1	31.135	5.584	-0.18	1.13288	1.00406
	MeJA-0h-Re2	31.428	5.877	0.113	0.924663
	MeJA-0h-Re3	31.382	5.831	0.067	0.954621
	MeJA-1.5h-Re1	35.459	9.52967	3.76567	0.0735227	0.0904998	***
	MeJA-1.5h-Re2	34.914	8.98467	3.22067	0.107271
	MeJA-1.5h-Re3	35.156	9.22667	3.46267	0.0907055
	MeJA-3h-Re1	35.113	3.16967	-2.59433	6.0391	5.9786	***
	MeJA-3h-Re2	35.092	3.14867	-2.61533	6.12765
	MeJA-3h-Re3	35.179	3.23567	-2.52833	5.76905
	MeJA-9h-Re1	35.152	3.48633	-2.27767	4.84893	4.54858	***
	MeJA-9h-Re2	35.245	3.57933	-2.18467	4.54622
	MeJA-9h-Re3	35.342	3.67633	-2.08767	4.2506
	MeJA-12h-Re1	35.435	4.78867	-0.975333	1.9661	2.12933	***
	MeJA-12h-Re2	35.413	4.76667	-0.997333	1.99631
	MeJA-12h-Re3	35.132	4.48567	-1.27833	2.42559
	MeJA-24h-Re1	36.812	5.26	-0.504	1.41814	1.61861	*
	MeJA-24h-Re2	36.621	5.069	-0.695	1.61888
	MeJA-24h-Re3	36.453	4.901	-0.863	1.81882
	ABA-0h-Re1	31.135	5.584	-0.18	1.13288	1.00406
	ABA-0h-Re2	31.428	5.877	0.113	0.924663
	ABA-0h-Re3	31.382	5.831	0.067	0.954621
	ABA-1.5h-Re1	28.336	5.845	0.081	0.945402	1.02301
	ABA-1.5h-Re2	28.053	5.562	-0.202	1.15029
	ABA-1.5h-Re3	28.294	5.803	0.039	0.973329
	ABA-3h-Re1	34.849	9.13767	3.37367	0.0964773	0.111229
	ABA-3h-Re2	34.804	9.09267	3.32867	0.099534
	ABA-3h-Re3	34.336	8.62467	2.86067	0.137675
	ABA-9h-Re1	29.327	6.92133	1.15733	0.44834	0.483394
	ABA-9h-Re2	29.13	6.72433	0.960333	0.513938
	ABA-9h-Re3	29.205	6.79933	1.03533	0.487903
	ABA-12h-Re1	36.265	2.82667	-2.93733	7.65994	8.70476	***
	ABA-12h-Re2	36.009	2.57067	-3.19333	9.14722
	ABA-12h-Re3	35.984	2.54567	-3.21833	9.30711
	ABA-24h-Re1	34.856	2.012	-3.752	13.473	14.1593	***
	ABA-24h-Re2	34.672	1.828	-3.936	15.3057
	ABA-24h-Re3	34.832	1.988	-3.776	13.699
SlJRL-06	SA-0h-Re1	33.473	7.64833	0.0186667	0.987145	1.00772
	SA-0h-Re2	33.663	7.83833	0.208667	0.865337
	SA-0h-Re3	33.227	7.40233	-0.227333	1.17067
	SA-1.5h-Re1	38.265	10.4833	2.85367	0.138344	0.131434	***
	SA-1.5h-Re2	38.335	10.5533	2.92367	0.131792
	SA-1.5h-Re3	38.421	10.6393	3.00967	0.124165
	SA-3h-Re1	36.526	14.693	7.06333	0.00747696	0.0090572	***
	SA-3h-Re2	36.028	14.195	6.56533	0.0105594
	SA-3h-Re3	36.237	14.404	6.77433	0.00913529
	SA-9h-Re1	33.41	12.8077	5.178	0.0276227	0.032203	***
	SA-9h-Re2	33.956	13.3537	5.724	0.0189193
	SA-9h-Re3	32.552	11.9497	4.32	0.0500669
	SA-12h-Re1	35.638	7.755	0.125333	0.916792	0.952101
	SA-12h-Re2	35.712	7.829	0.199333	0.870953
	SA-12h-Re3	35.417	7.534	-0.0956667	1.06856
	SA-24h-Re1	39.186	17.082	9.45233	0.00142746	0.00157739	***
	SA-24h-Re2	39.016	16.912	9.28233	0.00160598
	SA-24h-Re3	38.935	16.831	9.20133	0.00169872
	MeJA-0h-Re1	33.473	7.64833	0.0186667	0.987145	1.00772
	MeJA-0h-Re2	33.663	7.83833	0.208667	0.865337
	MeJA-0h-Re3	33.227	7.40233	-0.227333	1.17067
	MeJA-1.5h-Re1	23.963	4.81133	-2.81833	7.05347	6.02348	***
	MeJA-1.5h-Re2	24.394	5.24233	-2.38733	5.23189
	MeJA-1.5h-Re3	24.249	5.09733	-2.53233	5.78507
	MeJA-3h-Re1	35.587	11.5277	3.898	0.0670788	0.067987
	MeJA-3h-Re2	35.554	11.4947	3.865	0.0686308
	MeJA-3h-Re3	35.562	11.5027	3.873	0.0682513
	MeJA-9h-Re1	34.906	11.7547	4.125	0.0573128	0.0477225
	MeJA-9h-Re2	35.591	12.4397	4.81	0.0356489
	MeJA-9h-Re3	35.097	11.9457	4.316	0.0502059
	MeJA-12h-Re1	32.437	6.924	-0.705667	1.6309	2.0434
	MeJA-12h-Re2	32.111	6.598	-1.03167	2.04438
	MeJA-12h-Re3	31.847	6.334	-1.29567	2.4549
	MeJA-24h-Re1	27.589	6.11133	-1.51833	2.8646	2.60692	**
	MeJA-24h-Re2	27.908	6.43033	-1.19933	2.29634
	MeJA-24h-Re3	27.696	6.21833	-1.41133	2.65983
	ABA-0h-Re1	33.473	7.64833	0.0186667	0.987145	1.00772
	ABA-0h-Re2	33.663	7.83833	0.208667	0.865337
	ABA-0h-Re3	33.227	7.40233	-0.227333	1.17067
	ABA-1.5h-Re1	33.261	10.864	3.23433	0.10626	0.152244	***
	ABA-1.5h-Re2	32.336	9.939	2.30933	0.201754
	ABA-1.5h-Re3	32.776	10.379	2.74933	0.14872
	ABA-3h-Re1	35.773	12.598	4.96833	0.0319435	0.0312704	***
	ABA-3h-Re2	35.841	12.666	5.03633	0.0304728
	ABA-3h-Re3	35.798	12.623	4.99333	0.0313947
	ABA-9h-Re1	34.275	11.744	4.11433	0.0577381	0.0539116	***
	ABA-9h-Re2	34.492	11.961	4.33133	0.0496751
	ABA-9h-Re3	34.363	11.832	4.20233	0.0543215
	ABA-12h-Re1	33.275	11.7747	4.145	0.0565237	0.0506614	***
	ABA-12h-Re2	33.465	11.9647	4.335	0.049549
	ABA-12h-Re3	33.575	12.0747	4.445	0.0459115
	ABA-24h-Re1	38.624	15.0497	7.42	0.00583925	0.00575242	***
	ABA-24h-Re2	38.436	14.8617	7.232	0.00665198
	ABA-24h-Re3	38.917	15.3427	7.713	0.00476602
SlJRL-07	SA-0h-Re1	29.287	3.92733	-0.193	1.14314	1.03037
	SA-0h-Re2	29.163	3.80333	-0.317	1.24574
	SA-0h-Re3	29.99	4.63033	0.51	0.702222
	SA-1.5h-Re1	36.381	8.59933	4.479	0.0448422	0.0567792	***
	SA-1.5h-Re2	36.155	8.37333	4.253	0.0524469
	SA-1.5h-Re3	35.677	7.89533	3.775	0.0730486
	SA-3h-Re1	29.177	7.344	3.22367	0.107048	0.117797	***
	SA-3h-Re2	28.845	7.012	2.89167	0.134748
	SA-3h-Re3	29.117	7.284	3.16367	0.111594
	SA-9h-Re1	26.925	6.32267	2.20233	0.217286	0.192421	***
	SA-9h-Re2	27.149	6.54667	2.42633	0.186038
	SA-9h-Re3	27.246	6.64367	2.52333	0.173941
	SA-12h-Re1	36.976	6.437	2.31667	0.200731	0.215684	***
	SA-12h-Re2	36.793	6.254	2.13367	0.227878
	SA-12h-Re3	36.854	6.315	2.19467	0.218444
	SA-24h-Re1	28.574	6.47	2.34967	0.196191	0.21256	***
	SA-24h-Re2	28.123	6.019	1.89867	0.268191
	SA-24h-Re3	28.753	6.649	2.52867	0.173299
	MeJA-0h-Re1	29.287	3.92733	-0.193	1.14314	1.03037
	MeJA-0h-Re2	29.163	3.80333	-0.317	1.24574
	MeJA-0h-Re3	29.99	4.63033	0.51	0.702222
	MeJA-1.5h-Re1	33.633	7.62167	3.50133	0.0883067	0.091232	***
	MeJA-1.5h-Re2	33.674	7.66267	3.54233	0.0858324
	MeJA-1.5h-Re3	33.46	7.44867	3.32833	0.099557
	MeJA-3h-Re1	35.77	11.4673	7.347	0.00614232	0.0067492	***
	MeJA-3h-Re2	35.538	11.2353	7.115	0.00721392
	MeJA-3h-Re3	35.604	11.3013	7.181	0.00689134
	MeJA-9h-Re1	28.65	5.49867	1.37833	0.384663	0.460859	***
	MeJA-9h-Re2	28.204	5.05267	0.932333	0.52401
	MeJA-9h-Re3	28.349	5.19767	1.07733	0.473904
	MeJA-12h-Re1	30.628	5.22733	1.107	0.464258	0.504153	***
	MeJA-12h-Re2	30.539	5.13833	1.018	0.4938
	MeJA-12h-Re3	30.372	4.97133	0.851	0.5544
	MeJA-24h-Re1	27.404	5.92633	1.806	0.285983	0.310186	***
	MeJA-24h-Re2	27.284	5.80633	1.686	0.310787
	MeJA-24h-Re3	27.181	5.70333	1.583	0.333787
	ABA-0h-Re1	29.287	3.92733	-0.193	1.14314	1.03037
	ABA-0h-Re2	29.163	3.80333	-0.317	1.24574
	ABA-0h-Re3	29.99	4.63033	0.51	0.702222
	ABA-1.5h-Re1	30.824	8.427	4.30667	0.0505317	0.0506605	***
	ABA-1.5h-Re2	30.815	8.418	4.29767	0.0508479
	ABA-1.5h-Re3	30.822	8.425	4.30467	0.0506018
	ABA-3h-Re1	30.24	7.843	3.72267	0.075747	0.0744924	***
	ABA-3h-Re2	30.232	7.835	3.71467	0.0761682
	ABA-3h-Re3	30.322	7.925	3.80467	0.0715618
	ABA-9h-Re1	29.683	7.152	3.03167	0.122286	0.101638	***
	ABA-9h-Re2	30.028	7.497	3.37667	0.0962769
	ABA-9h-Re3	30.185	7.654	3.53367	0.0863496
	ABA-12h-Re1	39.136	6.19967	2.07933	0.236624	0.237742	***
	ABA-12h-Re2	38.808	5.87167	1.75133	0.297027
	ABA-12h-Re3	39.534	6.59767	2.47733	0.179576
	ABA-24h-Re1	29.597	6.02267	1.90233	0.26751	0.243122	***
	ABA-24h-Re2	29.945	6.37067	2.25033	0.210176
	ABA-24h-Re3	29.685	6.11067	1.99033	0.251681
SlJRL-08	SA-0h-Re1	33.544	2.72867	0.298667	0.813003	1.0147
	SA-0h-Re2	33.252	2.43667	0.00666667	0.99539
	SA-0h-Re3	32.94	2.12467	-0.305333	1.2357
	SA-1.5h-Re1	35.59	9.719	7.289	0.00639429	0.00718613	***
	SA-1.5h-Re2	35.46	9.589	7.159	0.00699723
	SA-1.5h-Re3	35.237	9.366	6.936	0.00816688
	SA-3h-Re1	32.267	2.68267	0.252667	0.839344	0.887536
	SA-3h-Re2	32.262	2.67767	0.247667	0.842258
	SA-3h-Re3	32.042	2.45767	0.0276667	0.981006
	SA-9h-Re1	34.183	1.29	-1.14	2.20381	2.41316	***
	SA-9h-Re2	33.968	1.075	-1.355	2.55797
	SA-9h-Re3	34.014	1.121	-1.309	2.4777
	SA-12h-Re1	35.864	5.325	2.895	0.134437	0.154255	***
	SA-12h-Re2	35.551	5.012	2.582	0.167009
	SA-12h-Re3	35.601	5.062	2.632	0.16132
	SA-24h-Re1	35.727	1.26633	-1.16367	2.24026	2.63204	***
	SA-24h-Re2	35.562	1.10133	-1.32867	2.5117
	SA-24h-Re3	35.238	0.777333	-1.65267	3.14414
	MeJA-0h-Re1	33.544	2.72867	0.298667	0.813003	1.0147
	MeJA-0h-Re2	33.252	2.43667	0.00666667	0.99539
	MeJA-0h-Re3	32.94	2.12467	-0.305333	1.2357
	MeJA-1.5h-Re1	27.874	8.72233	6.29233	0.0127591	0.0132462	***
	MeJA-1.5h-Re2	27.887	8.73533	6.30533	0.0126446
	MeJA-1.5h-Re3	27.706	8.55433	6.12433	0.0143348
	MeJA-3h-Re1	35.07	11.0107	8.58067	0.00261193	0.00212927	***
	MeJA-3h-Re2	35.666	11.6067	9.17667	0.00172802
	MeJA-3h-Re3	35.421	11.3617	8.93167	0.00204786
	MeJA-9h-Re1	32.964	9.81267	7.38267	0.00599233	0.00581886	***
	MeJA-9h-Re2	32.763	9.61167	7.18167	0.00688816
	MeJA-9h-Re3	33.353	10.2017	7.77167	0.0045761
	MeJA-12h-Re1	36.297	6.11733	3.68733	0.0776251	0.0798976	***
	MeJA-12h-Re2	36.238	6.05833	3.62833	0.0808654
	MeJA-12h-Re3	36.232	6.05233	3.62233	0.0812024
	MeJA-24h-Re1	33.966	12.4883	10.0583	0.000937864	0.000984141	***
	MeJA-24h-Re2	33.869	12.3913	9.96133	0.00100309
	MeJA-24h-Re3	33.857	12.3793	9.94933	0.00101147
	ABA-0h-Re1	33.544	2.72867	0.298667	0.813003	1.0147
	ABA-0h-Re2	33.252	2.43667	0.00666667	0.99539
	ABA-0h-Re3	32.94	2.12467	-0.305333	1.2357
	ABA-1.5h-Re1	35.933	13.536	11.106	0.000453692	0.000637149	*
	ABA-1.5h-Re2	35.097	12.7	10.27	0.000809882
	ABA-1.5h-Re3	35.419	13.022	10.592	0.000647874
	ABA-3h-Re1	36.192	10.5017	8.07167	0.00371695	0.00348117	*
	ABA-3h-Re2	36.654	10.9637	8.53367	0.00269843
	ABA-3h-Re3	36.076	10.3857	7.95567	0.00402815
	ABA-9h-Re1	35.512	12.981	10.551	0.00066655	0.000792206	*
	ABA-9h-Re2	34.905	12.374	9.944	0.00101521
	ABA-9h-Re3	35.452	12.921	10.491	0.000694855
	ABA-12h-Re1	35.214	2.27767	-0.152333	1.11137	1.02751
	ABA-12h-Re2	34.961	2.02467	-0.405333	1.32439
	ABA-12h-Re3	35.995	3.05867	0.628667	0.646774
	ABA-24h-Re1	34.856	0.0356667	-2.39433	5.25734	5.55287	***
	ABA-24h-Re2	34.577	-0.243333	-2.67333	6.37901
	ABA-24h-Re3	34.922	0.101667	-2.32833	5.02225
