# Supplementary material for: Genome-wide characterization and expression analysis of the JRL gene family in response to hormones and abiotic stress in tomato (Solanum lycopersicum L.)
Source: PeerJ. 2025 Jul 21;13:e19724. doi: 10.7717/peerj.19724 (PMC12288746; doi:10.7717/peerj.19724)
Supplement: Supplemental Information 9 [file peerj-13-19724-s009.xlsx]

## Sheet: Sheet1
Supplementary File 3. Raw data of SlJRLs expressions under different treatment for data analyses and preparation for Figure 8.
Gene Name	Sample Name	Cт	∆CT	∆∆CT	2-∆∆CT	Average (2-∆∆CT)	Asterisk
SlJRL-02	4℃-0h-Re1	33.784	9.28733	-0.179667	1.13262	1.00443
	4℃-0h-Re2	33.998	9.50133	0.0343333	0.976483
	4℃-0h-Re3	34.109	9.61233	0.145333	0.90417
	4℃-1.5h-Re1	35.366	9.799	0.332	0.794434	0.749713
	4℃-1.5h-Re2	35.4	9.833	0.366	0.775931
	4℃-1.5h-Re3	35.593	10.026	0.559	0.678772
	4℃-3h-Re1	32.858	10.2197	0.752667	0.593506	0.762229
	4℃-3h-Re2	32.782	10.1437	0.676667	0.625609
	4℃-3h-Re3	32.011	9.37267	-0.0943333	1.06757
	4℃-9h-Re1	32.423	8.03367	-1.43333	2.7007	2.69306
	4℃-9h-Re2	32.593	8.20367	-1.26333	2.4005
	4℃-9h-Re3	32.282	7.89267	-1.57433	2.97798
	4℃-12h-Re1	30.42	3.85667	-5.61033	48.8516	48.1603	***
	4℃-12h-Re2	30.507	3.94367	-5.52333	45.9927
	4℃-12h-Re3	30.397	3.83367	-5.63333	49.6366
	4℃-24h-Re1	36.933	11.3033	1.83633	0.280033	0.308805
	4℃-24h-Re2	36.8	11.1703	1.70333	0.307076
	4℃-24h-Re3	36.656	11.0263	1.55933	0.339308
	PEG-0h-Re1	33.784	9.28733	-0.179667	1.13262	1.00443
	PEG-0h-Re2	33.998	9.50133	0.0343333	0.976483
	PEG-0h-Re3	34.109	9.61233	0.145333	0.90417
	PEG-1.5h-Re1	31.849	9.79367	0.326667	0.797377	0.755517
	PEG-1.5h-Re2	31.845	9.78967	0.322667	0.799591
	PEG-1.5h-Re3	32.101	10.0457	0.578667	0.669582
	PEG-3h-Re1	32.901	9.22167	-0.245333	1.18537	1.16662
	PEG-3h-Re2	32.822	9.14267	-0.324333	1.25209
	PEG-3h-Re3	33.059	9.37967	-0.0873333	1.0624
	PEG-9h-Re1	30.389	8.035	-1.432	2.69821	2.76473	***
	PEG-9h-Re2	30.439	8.085	-1.382	2.60629
	PEG-9h-Re3	30.241	7.887	-1.58	2.9897
	PEG-12h-Re1	32.125	8.63967	-0.827333	1.7744	1.60932
	PEG-12h-Re2	32.363	8.87767	-0.589333	1.50455
	PEG-12h-Re3	32.321	8.83567	-0.631333	1.549
	PEG-24h-Re1	36.398	11.3843	1.91733	0.264743	0.303063	*
	PEG-24h-Re2	36.181	11.1673	1.70033	0.307715
	PEG-24h-Re3	36.051	11.0373	1.57033	0.336731
	NaCl-0h-Re1	33.784	9.28733	-0.179667	1.13262	1.00443
	NaCl-0h-Re2	33.998	9.50133	0.0343333	0.976483
	NaCl-0h-Re3	34.109	9.61233	0.145333	0.90417
	NaCl-1.5h-Re1	32.858	7.897	-1.57	2.96905	2.96769	***
	NaCl-1.5h-Re2	32.864	7.903	-1.564	2.95672
	NaCl-1.5h-Re3	32.854	7.893	-1.574	2.97729
	NaCl-3h-Re1	37.217	11.6373	2.17033	0.222159	0.188816	**
	NaCl-3h-Re2	37.889	12.3093	2.84233	0.139435
	NaCl-3h-Re3	37.334	11.7543	2.28733	0.204854
	NaCl-9h-Re1	32.303	8.71567	-0.751333	1.68335	1.53643
	NaCl-9h-Re2	32.52	8.93267	-0.534333	1.44827
	NaCl-9h-Re3	32.491	8.90367	-0.563333	1.47768
	NaCl-12h-Re1	33.109	10.026	0.559	0.678772	0.62032
	NaCl-12h-Re2	33.06	9.977	0.51	0.702222
	NaCl-12h-Re3	33.609	10.526	1.059	0.479965
	NaCl-24h-Re1	30.222	7.51233	-1.95467	3.87626	3.55845	***
	NaCl-24h-Re2	30.518	7.80833	-1.65867	3.15725
	NaCl-24h-Re3	30.312	7.60233	-1.86467	3.64184
SlJRL-04	4℃-0h-Re1	32.591	6.89067	0.151	0.900626	1.01977
	4℃-0h-Re2	32.047	6.34667	-0.393	1.31312
	4℃-0h-Re3	32.682	6.98167	0.242	0.845572
	4℃-1.5h-Re1	31.863	5.58633	-1.15333	2.22427	2.69421
	4℃-1.5h-Re2	31.547	5.27033	-1.46933	2.76894
	4℃-1.5h-Re3	31.389	5.11233	-1.62733	3.08941
	4℃-3h-Re1	32.831	6.06567	-0.674	1.59549	1.77394
	4℃-3h-Re2	32.928	6.16267	-0.577	1.49174
	4℃-3h-Re3	32.345	5.57967	-1.16	2.23457
	4℃-9h-Re1	33.472	3.12533	-3.61433	12.2468	10.3911	***
	4℃-9h-Re2	33.845	3.49833	-3.24133	9.45668
	4℃-9h-Re3	33.843	3.49633	-3.24333	9.4698
	4℃-12h-Re1	29.608	4.362	-2.37767	5.19696	5.69072	**
	4℃-12h-Re2	29.556	4.31	-2.42967	5.38769
	4℃-12h-Re3	29.288	4.042	-2.69767	6.48752
	4℃-24h-Re1	34.247	8.061	1.32133	0.400165	0.431031
	4℃-24h-Re2	33.959	7.773	1.03333	0.48858
	4℃-24h-Re3	34.232	8.046	1.30633	0.404347
	PEG-0h-Re1	32.591	6.89067	0.151	0.900626	1.01977
	PEG-0h-Re2	32.047	6.34667	-0.393	1.31312
	PEG-0h-Re3	32.682	6.98167	0.242	0.845572
	PEG-1.5h-Re1	29.728	4.881	-1.85867	3.62672	3.88292	***
	PEG-1.5h-Re2	29.459	4.612	-2.12767	4.3701
	PEG-1.5h-Re3	29.718	4.871	-1.86867	3.65195
	PEG-3h-Re1	31.674	6.04333	-0.696333	1.62038	1.69134
	PEG-3h-Re2	31.312	5.68133	-1.05833	2.08252
	PEG-3h-Re3	31.915	6.28433	-0.455333	1.3711
	PEG-9h-Re1	29.599	5.241	-1.49867	2.82581	2.84876	***
	PEG-9h-Re2	29.485	5.127	-1.61267	3.05817
	PEG-9h-Re3	29.685	5.327	-1.41267	2.66229
	PEG-12h-Re1	30.539	7.32933	0.589667	0.664496	0.681404
	PEG-12h-Re2	30.364	7.15433	0.414667	0.750193
	PEG-12h-Re3	30.617	7.40733	0.667667	0.629524
	PEG-24h-Re1	31.12	5.63567	-1.104	2.1495	2.25909	**
	PEG-24h-Re2	30.855	5.37067	-1.369	2.58291
	PEG-24h-Re3	31.192	5.70767	-1.032	2.04486
	NaCl-0h-Re1	32.591	6.89067	0.151	0.900626	1.01977
	NaCl-0h-Re2	32.047	6.34667	-0.393	1.31312
	NaCl-0h-Re3	32.682	6.98167	0.242	0.845572
	NaCl-1.5h-Re1	30.686	2.37967	-4.36	20.5348	20.8516	***
	NaCl-1.5h-Re2	30.579	2.27267	-4.467	22.1157
	NaCl-1.5h-Re3	30.731	2.42467	-4.315	19.9042
	NaCl-3h-Re1	31.432	5.317	-1.42267	2.68081	2.9479	*
	NaCl-3h-Re2	31.477	5.362	-1.37767	2.59848
	NaCl-3h-Re3	31.021	4.906	-1.83367	3.56442
	NaCl-9h-Re1	31.948	5.527	-1.21267	2.31766	2.17316
	NaCl-9h-Re2	31.927	5.506	-1.23367	2.35164
	NaCl-9h-Re3	32.273	5.852	-0.887667	1.85018
	NaCl-12h-Re1	32.11	3.819	-2.92067	7.57196	6.67115	***
	NaCl-12h-Re2	32.511	4.22	-2.51967	5.7345
	NaCl-12h-Re3	32.285	3.994	-2.74567	6.707
	NaCl-24h-Re1	30.462	5.236	-1.50367	2.83562	2.61321	*
	NaCl-24h-Re2	30.708	5.482	-1.25767	2.39109
	NaCl-24h-Re3	30.58	5.354	-1.38567	2.61293
SlJRL-05	4℃-0h-Re1	31.135	5.584	-0.18	1.13288	1.00406
	4℃-0h-Re2	31.428	5.877	0.113	0.924663
	4℃-0h-Re3	31.382	5.831	0.067	0.954621
	4℃-1.5h-Re1	32.916	6.846	1.082	0.472374	0.378742	***
	4℃-1.5h-Re2	33.374	7.304	1.54	0.343885
	4℃-1.5h-Re3	33.478	7.408	1.644	0.319968
	4℃-3h-Re1	32.543	5.739	-0.025	1.01748	1.14985
	4℃-3h-Re2	32.242	5.438	-0.326	1.25353
	4℃-3h-Re3	32.331	5.527	-0.237	1.17854
	4℃-9h-Re1	35.516	9.853	4.089	0.0587609	0.0531389	***
	4℃-9h-Re2	35.742	10.079	4.315	0.0502407
	4℃-9h-Re3	35.737	10.074	4.31	0.0504151
	4℃-12h-Re1	35.475	10.229	4.465	0.0452794	0.0493015	***
	4℃-12h-Re2	35.243	9.997	4.233	0.053179
	4℃-12h-Re3	35.348	10.102	4.338	0.0494461
	4℃-24h-Re1	35.412	9.48333	3.71933	0.0759223	0.0795952	***
	4℃-24h-Re2	35.352	9.42333	3.65933	0.0791464
	4℃-24h-Re3	35.271	9.34233	3.57833	0.0837171
	PEG-0h-Re1	31.135	5.584	-0.18	1.13288	1.00406
	PEG-0h-Re2	31.428	5.877	0.113	0.924663
	PEG-0h-Re3	31.382	5.831	0.067	0.954621
	PEG-1.5h-Re1	29.314	4.51767	-1.24633	2.37238	2.30166	***
	PEG-1.5h-Re2	29.327	4.53067	-1.23333	2.3511
	PEG-1.5h-Re3	29.435	4.63867	-1.12533	2.18152
	PEG-3h-Re1	32.262	6.34267	0.578667	0.669582	0.692762	**
	PEG-3h-Re2	32.199	6.27967	0.515667	0.69947
	PEG-3h-Re3	32.179	6.25967	0.495667	0.709234
	PEG-9h-Re1	31.35	6.937	1.173	0.443498	0.539509	***
	PEG-9h-Re2	30.827	6.414	0.65	0.63728
	PEG-9h-Re3	31.072	6.659	0.895	0.537747
	PEG-12h-Re1	31.216	7.72133	1.95733	0.257504	0.232354	***
	PEG-12h-Re2	31.348	7.85333	2.08933	0.234989
	PEG-12h-Re3	31.548	8.05333	2.28933	0.20457
	PEG-24h-Re1	32.22	8.25733	2.49333	0.177595	0.184685	***
	PEG-24h-Re2	32.022	8.05933	2.29533	0.203721
	PEG-24h-Re3	32.26	8.29733	2.53333	0.172739
	NaCl-0h-Re1	31.135	5.584	-0.18	1.13288	1.00406
	NaCl-0h-Re2	31.428	5.877	0.113	0.924663
	NaCl-0h-Re3	31.382	5.831	0.067	0.954621
	NaCl-1.5h-Re1	31.771	5.59333	-0.170667	1.12558	1.00375
	NaCl-1.5h-Re2	32.191	6.01333	0.249333	0.841285
	NaCl-1.5h-Re3	31.879	5.70133	-0.0626667	1.04439
	NaCl-3h-Re1	31.012	5.129	-0.635	1.55294	1.35451	*
	NaCl-3h-Re2	31.327	5.444	-0.32	1.24833
	NaCl-3h-Re3	31.311	5.428	-0.336	1.26225
	NaCl-9h-Re1	32.665	6.405	0.641	0.641268	0.691968	*
	NaCl-9h-Re2	32.563	6.303	0.539	0.688248
	NaCl-9h-Re3	32.446	6.186	0.422	0.746389
	NaCl-12h-Re1	34.225	5.934	0.17	0.888843	0.976252
	NaCl-12h-Re2	34.031	5.74	-0.024	1.01677
	NaCl-12h-Re3	34.022	5.731	-0.033	1.02314
	NaCl-24h-Re1	30.854	5.47	-0.294	1.22603	1.2308
	NaCl-24h-Re2	30.75	5.366	-0.398	1.31768
	NaCl-24h-Re3	30.948	5.564	-0.2	1.1487
SlJRL-06	4℃-0h-Re1	33.473	7.64833	0.0186667	0.987145	1.00772
	4℃-0h-Re2	33.663	7.83833	0.208667	0.865337
	4℃-0h-Re3	33.227	7.40233	-0.227333	1.17067
	4℃-1.5h-Re1	35.867	9.61667	1.987	0.252263	0.384021	*
	4℃-1.5h-Re2	35.01	8.75967	1.13	0.456916
	4℃-1.5h-Re3	35.055	8.80467	1.175	0.442884
	4℃-3h-Re1	33.195	7.23967	-0.39	1.31039	1.31712
	4℃-3h-Re2	33.281	7.32567	-0.304	1.23456
	4℃-3h-Re3	33.093	7.13767	-0.492	1.40639
	4℃-9h-Re1	32.967	8.57	0.940333	0.521112	0.50498
	4℃-9h-Re2	32.633	8.236	0.606333	0.656864
	4℃-9h-Re3	33.596	9.199	1.56933	0.336964
	4℃-12h-Re1	32.419	7.173	-0.456667	1.37237	1.52112
	4℃-12h-Re2	32.59	7.344	-0.285667	1.21897
	4℃-12h-Re3	31.896	6.65	-0.979667	1.97201
	4℃-24h-Re1	35.835	8.953	1.32333	0.399611	0.367194	*
	4℃-24h-Re2	36.131	9.249	1.61933	0.325486
	4℃-24h-Re3	35.921	9.039	1.40933	0.376486
	PEG-0h-Re1	33.473	7.64833	0.0186667	0.987145	1.00772
	PEG-0h-Re2	33.663	7.83833	0.208667	0.865337
	PEG-0h-Re3	33.227	7.40233	-0.227333	1.17067
	PEG-1.5h-Re1	30.087	5.357	-2.27267	4.83215	4.96214	***
	PEG-1.5h-Re2	30.016	5.286	-2.34367	5.07591
	PEG-1.5h-Re3	30.044	5.314	-2.31567	4.97835
	PEG-3h-Re1	30.687	5.122	-2.50767	5.687	5.95047	***
	PEG-3h-Re2	30.494	4.929	-2.70067	6.50102
	PEG-3h-Re3	30.693	5.128	-2.50167	5.66339
	PEG-9h-Re1	33.305	8.476	0.846333	0.556197	0.608531
	PEG-9h-Re2	32.907	8.078	0.448333	0.732889
	PEG-9h-Re3	33.357	8.528	0.898333	0.536506
	PEG-12h-Re1	31.693	6.67967	-0.95	1.93187	2.06586
	PEG-12h-Re2	31.388	6.37467	-1.255	2.38667
	PEG-12h-Re3	31.733	6.71967	-0.91	1.87905
	PEG-24h-Re1	33.093	7.426	-0.203667	1.15162	1.08619
	PEG-24h-Re2	33.365	7.698	0.0683333	0.953739
	PEG-24h-Re3	33.091	7.424	-0.205667	1.15322
	NaCl-0h-Re1	33.473	7.64833	0.0186667	0.987145	1.00772
	NaCl-0h-Re2	33.663	7.83833	0.208667	0.865337
	NaCl-0h-Re3	33.227	7.40233	-0.227333	1.17067
	NaCl-1.5h-Re1	31.202	5.39267	-2.237	4.71416	4.47651	***
	NaCl-1.5h-Re2	31.232	5.42267	-2.207	4.61714
	NaCl-1.5h-Re3	31.404	5.59467	-2.035	4.09823
	NaCl-3h-Re1	30.295	5.45167	-2.178	4.52526	4.34311	***
	NaCl-3h-Re2	30.406	5.56267	-2.067	4.19014
	NaCl-3h-Re3	30.364	5.52067	-2.109	4.31392
	NaCl-9h-Re1	34.198	8.07133	0.441667	0.736284	0.650435
	NaCl-9h-Re2	34.675	8.54833	0.918667	0.528998
	NaCl-9h-Re3	34.3	8.17333	0.543667	0.686025
	NaCl-12h-Re1	33.554	7.65	0.0203333	0.986005	0.968742
	NaCl-12h-Re2	33.575	7.671	0.0413333	0.971756
	NaCl-12h-Re3	33.61	7.706	0.0763333	0.948465
	NaCl-24h-Re1	32.41	7.85833	0.228667	0.853423	0.80168
	NaCl-24h-Re2	32.707	8.15533	0.525667	0.694638
	NaCl-24h-Re3	32.404	7.85233	0.222667	0.85698
SlJRL-07	4℃-0h-Re1	29.287	3.92733	-0.193	1.14314	1.03037
	4℃-0h-Re2	29.163	3.80333	-0.317	1.24574
	4℃-0h-Re3	29.99	4.63033	0.51	0.702222
	4℃-1.5h-Re1	33.108	7.85467	3.73433	0.075137	0.0648552	***
	4℃-1.5h-Re2	33.374	8.12067	4.00033	0.0624856
	4℃-1.5h-Re3	33.508	8.25467	4.13433	0.0569432
	4℃-3h-Re1	31.049	6.164	2.04367	0.242547	0.197642	***
	4℃-3h-Re2	31.632	6.747	2.62667	0.161918
	4℃-3h-Re3	31.413	6.528	2.40767	0.18846
	4℃-9h-Re1	32.894	8.14533	4.025	0.0614263	0.0530636	***
	4℃-9h-Re2	33.484	8.73533	4.615	0.0408081
	4℃-9h-Re3	33.003	8.25433	4.134	0.0569563
	4℃-12h-Re1	28.385	5.39033	1.27	0.41466	0.377721	***
	4℃-12h-Re2	28.697	5.70233	1.582	0.334019
	4℃-12h-Re3	28.494	5.49933	1.379	0.384485
	4℃-24h-Re1	34.946	8.98367	4.86333	0.0343551	0.0351992	***
	4℃-24h-Re2	34.771	8.80867	4.68833	0.0387856
	4℃-24h-Re3	35.028	9.06567	4.94533	0.0324568
	PEG-0h-Re1	29.287	3.92733	-0.193	1.14314	1.03037
	PEG-0h-Re2	29.163	3.80333	-0.317	1.24574
	PEG-0h-Re3	29.99	4.63033	0.51	0.702222
	PEG-1.5h-Re1	30.791	6.56267	2.44233	0.183986	0.167533	***
	PEG-1.5h-Re2	30.655	6.42667	2.30633	0.202174
	PEG-1.5h-Re3	31.451	7.22267	3.10233	0.116441
	PEG-3h-Re1	29.968	5.307	1.18667	0.439317	0.367244	***
	PEG-3h-Re2	30.236	5.575	1.45467	0.364839
	PEG-3h-Re3	30.53	5.869	1.74867	0.297577
	PEG-9h-Re1	30.039	6.216	2.09567	0.23396	0.23623	***
	PEG-9h-Re2	29.947	6.124	2.00367	0.249365
	PEG-9h-Re3	30.093	6.27	2.14967	0.225365
	PEG-12h-Re1	30.399	6.225	2.10467	0.232505	0.262858	***
	PEG-12h-Re2	30.478	6.304	2.18367	0.220116
	PEG-12h-Re3	29.868	5.694	1.57367	0.335953
	PEG-24h-Re1	30.123	5.75567	1.63533	0.232505	0.262858	***
	PEG-24h-Re2	30.104	5.73667	1.61633	0.220116
	PEG-24h-Re3	30.648	6.28067	2.16033	0.335953
	NaCl-0h-Re1	29.287	3.92733	-0.193	1.14314	1.03037
	NaCl-0h-Re2	29.163	3.80333	-0.317	1.24574
	NaCl-0h-Re3	29.99	4.63033	0.51	0.702222
	NaCl-1.5h-Re1	31.055	5.93967	1.81933	0.283352	0.283345	***
	NaCl-1.5h-Re2	30.982	5.86667	1.74633	0.298058
	NaCl-1.5h-Re3	31.132	6.01667	1.89633	0.268625
	NaCl-3h-Re1	30.348	6.38433	2.264	0.208194	0.258133	***
	NaCl-3h-Re2	29.731	5.76733	1.647	0.319303
	NaCl-3h-Re3	30.102	6.13833	2.018	0.2469
	NaCl-9h-Re1	31.478	5.957	1.83667	0.279968	0.289794	***
	NaCl-9h-Re2	31.397	5.876	1.75567	0.296136
	NaCl-9h-Re3	31.411	5.89	1.76967	0.293276
	NaCl-12h-Re1	31.195	6.21133	2.091	0.234718	0.331874	***
	NaCl-12h-Re2	31.003	6.01933	1.899	0.268129
	NaCl-12h-Re3	30.125	5.14133	1.021	0.492775
	NaCl-24h-Re1	31.507	7.25333	3.133	0.113992	0.14541	***
	NaCl-24h-Re2	31.199	6.94533	2.825	0.141121
	NaCl-24h-Re3	30.839	6.58533	2.465	0.181118
SlJRL-08	4℃-0h-Re1	33.544	2.72867	0.298667	0.813003	1.0147
	4℃-0h-Re2	33.252	2.43667	0.00666667	0.99539
	4℃-0h-Re3	32.94	2.12467	-0.305333	1.2357
	4℃-1.5h-Re1	33.172	8.61467	6.18467	0.0137477	0.0108981	***
	4℃-1.5h-Re2	33.817	9.25967	6.82967	0.00879155
	4℃-1.5h-Re3	33.609	9.05167	6.62167	0.010155
	4℃-3h-Re1	30.885	8.02133	5.59133	0.0207415	0.0235914	***
	4℃-3h-Re2	30.816	7.95233	5.52233	0.0217577
	4℃-3h-Re3	30.438	7.57433	5.14433	0.0282749
	4℃-9h-Re1	32.696	7.92033	5.49033	0.0222456	0.0255234	***
	4℃-9h-Re2	32.768	7.99233	5.56233	0.0211627
	4℃-9h-Re3	32.12	7.34433	4.91433	0.0331618
	4℃-12h-Re1	31.122	7.01567	4.58567	0.0416463	0.0383727	***
	4℃-12h-Re2	31.301	7.19467	4.76467	0.0367868
	4℃-12h-Re3	31.305	7.19867	4.76867	0.036685
	4℃-24h-Re1	30.876	7.49967	5.06967	0.0297768	0.0256981	***
	4℃-24h-Re2	30.884	7.50767	5.07767	0.0296122
	4℃-24h-Re3	31.626	8.24967	5.81967	0.0177054
	PEG-0h-Re1	33.544	2.72867	0.298667	0.813003	1.0147
	PEG-0h-Re2	33.252	2.43667	0.00666667	0.99539
	PEG-0h-Re3	32.94	2.12467	-0.305333	1.2357
	PEG-1.5h-Re1	30.725	7.633	5.203	0.0271482	0.0265743	***
	PEG-1.5h-Re2	30.578	7.486	5.056	0.0300602
	PEG-1.5h-Re3	30.995	7.903	5.473	0.0225145
	PEG-3h-Re1	35.04	10.8533	8.42333	0.00291289	0.00737772	***
	PEG-3h-Re2	32.532	8.34533	5.91533	0.0165694
	PEG-3h-Re3	35.176	10.9893	8.55933	0.00265084
	PEG-9h-Re1	32.146	9.03767	6.60767	0.010254	0.010684	***
	PEG-9h-Re2	32.113	9.00467	6.57467	0.0104913
	PEG-9h-Re3	32.005	8.89667	6.46667	0.0113068
	PEG-12h-Re1	31.474	8.24567	5.81567	0.0177546	0.021311	***
	PEG-12h-Re2	30.931	7.70267	5.27267	0.0258684
	PEG-12h-Re3	31.28	8.05167	5.62167	0.02031
	PEG-24h-Re1	33.015	9.50467	7.07467	0.00741845	0.00805746	***
	PEG-24h-Re2	33.256	9.74567	7.31567	0.00627718
	PEG-24h-Re3	32.517	9.00667	6.57667	0.0104767
	NaCl-0h-Re1	33.544	2.72867	0.298667	0.813003	1.0147
	NaCl-0h-Re2	33.252	2.43667	0.00666667	0.99539
	NaCl-0h-Re3	32.94	2.12467	-0.305333	1.2357
	NaCl-1.5h-Re1	33.94	4.54633	2.11633	0.230632	0.231279	*
	NaCl-1.5h-Re2	33.718	4.32433	1.89433	0.268998
	NaCl-1.5h-Re3	34.188	4.79433	2.36433	0.194207
	NaCl-3h-Re1	33.376	9.344	6.914	0.00829237	0.00987893	**
	NaCl-3h-Re2	32.739	8.707	6.277	0.0128954
	NaCl-3h-Re3	33.349	9.317	6.887	0.00844902
	NaCl-9h-Re1	34.492	4.63167	2.20167	0.217386	0.222406	*
	NaCl-9h-Re2	34.738	4.87767	2.44767	0.183307
	NaCl-9h-Re3	34.198	4.33767	1.90767	0.266523
	NaCl-12h-Re1	35.053	1.35633	-1.07367	2.10478	2.30145	***
	NaCl-12h-Re2	34.508	0.811333	-1.61867	3.07091
	NaCl-12h-Re3	35.337	1.64033	-0.789667	1.72868
	NaCl-24h-Re1	36.291	11.0737	8.64367	0.00250033	0.00229056	**
	NaCl-24h-Re2	36.311	11.0937	8.66367	0.00246591
	NaCl-24h-Re3	36.683	11.4657	9.03567	0.00190543
