# Supplementary material for: Genome-wide characterization and expression analysis of the JRL gene family in response to hormones and abiotic stress in tomato (Solanum lycopersicum L.)
Source: PeerJ. 2025 Jul 21;13:e19724. doi: 10.7717/peerj.19724 (PMC12288746; doi:10.7717/peerj.19724)
Supplement: Supplemental Information 10 [file peerj-13-19724-s010.xls]

## Sheet: Sheet1
ITEM TO CHECK	IMPORTANCE	CHECKLIST
EXPERIMENTAL DESIGN
Definition of experimental and control groups	E	Page 4, lines 98-111
Number within each group	E	Page 4, lines 109-111
Assay carried out by core lab or investigator's lab?	D
Acknowledgement of authors' contributions	D
SAMPLE
Description	E	Page 4, lines 98-111
Volume/mass of sample processed	D
Microdissection or macrodissection	E	macrodissection, lines 98-111
Processing procedure	E	Page 4, lines 98-111
If frozen - how and how quickly?	E	Page 4, lines 111
If fixed - with what, how quickly?	E	Page 4, lines 98-111
Sample storage conditions and duration (especially for FFPE samples)	E	Page 4, lines 111
NUCLEIC ACID EXTRACTION
Procedure and/or instrumentation	E	Page 5, lines 155-156
Name of kit and details of any modifications	E	Page 5, lines 156-157
Source of additional reagents used	D
Details of DNase or RNAse treatment	E	Page 5, lines 155-157
Contamination assessment (DNA or RNA)	E	Page 5, lines 155-157
Nucleic acid quantification	E	Page 5, lines 156-157
Instrument and method	E	Page 5, lines 156-157
Purity (A260/A280)	D
Yield	D
RNA integrity method/instrument	E	Page 5, lines 155-157
RIN/RQI or Cq of 3' and 5' transcripts	E	Page 5, lines 155-157
Electrophoresis traces	D
Inhibition testing (Cq dilutions, spike or other)	E	Page 5, lines 155-168
REVERSE TRANSCRIPTION
Complete reaction conditions	E	Page 5, lines 157-159
Amount of RNA and reaction volume	E	Page 5, lines 155-168
Priming oligonucleotide (if using GSP) and concentration	E	Page 5, lines 161-164
Reverse transcriptase and concentration	E	Page 5, lines 158-159
Temperature and time	E	Page 5, lines 162-163
Manufacturer of reagents and catalogue numbers	D
Cqs with and without RT	D*
Storage conditions of cDNA	D
qPCR TARGET INFORMATION
If multiplex, efficiency and LOD of each assay.	E	Page 5, lines 162-163
Sequence accession number	E	Page 5, lines 163-164
Location of amplicon	D
Amplicon length	E	Page 5, lines 165-168
In silico specificity screen (BLAST, etc)	E	Page 5, lines 164-165
Pseudogenes, retropseudogenes or other homologs?	D
Sequence alignment	D
Secondary structure analysis of amplicon	D
Location of each primer by exon or intron (if applicable)	E	Page 5, lines 164-165
What splice variants are targeted?	E	Page 5, lines 163-165
qPCR OLIGONUCLEOTIDES
Primer sequences	E	Page 5, lines 164-165
RTPrimerDB Identification Number	D
Probe sequences	D**
Location and identity of any modifications	E	Page 5, lines 164-165
Manufacturer of oligonucleotides	D
Purification method	D
qPCR PROTOCOL
Complete reaction conditions	E	Page 5, lines 162-163
Reaction volume and amount of cDNA/DNA	E	Page 5, lines 160-162
Primer, (probe), Mg++ and dNTP concentrations	E	Page 5, lines 159-162
Polymerase identity and concentration	E	Page 5, lines 159-162
Buffer/kit identity and manufacturer	E	Page 5, lines 159-162
Exact chemical constitution of the buffer	D
Additives (SYBR Green I, DMSO, etc.)	E	Page 5, lines 159-162
Manufacturer of plates/tubes and catalog number	D
Complete thermocycling parameters	E	Page 5, lines 159-162
Reaction setup (manual/robotic)	D
Manufacturer of qPCR instrument	E	Page 5, lines 159-162
qPCR VALIDATION
Evidence of optimisation (from gradients)	D
Specificity (gel, sequence, melt, or digest)	E	Page 5, lines 159-164
For SYBR Green I, Cq of the NTC	E	Page 5, lines 159-164
Standard curves with slope and y-intercept	E	Page 5, lines 159-164
PCR efficiency calculated from slope	E	Page 5, lines 159-164
Confidence interval for PCR efficiency or standard error	D
r2 of standard curve	E	Page 5, lines 159-164
Linear dynamic range	E	Page 5, lines 159-164
Cq variation at lower limit	E	Page 5, lines 159-164
Confidence intervals throughout range	D
Evidence for limit of detection	E	Page 5, lines 159-164
If multiplex, efficiency and LOD of each assay.	E	Page 5, lines 159-164
DATA ANALYSIS
qPCR analysis program (source, version)	E	Page 6, lines 167-170
Cq method determination	E	Page 6, lines 167-170
Outlier identification and disposition	E	Page 6, lines 167-170
Results of NTCs	E	Page 6, lines 167-170
Justification of number and choice of reference genes	E	Page 6, lines 167-170
Description of normalisation method	E	Page 6, lines 167-170
Number and concordance of biological replicates	D
Number and stage (RT or qPCR) of technical replicates	E	Page 5, lines 165-166
Repeatability (intra-assay variation)	E
Reproducibility (inter-assay variation, %CV)	D
Power analysis	D
Statistical methods for result significance	E	Page 6, lines 167-170
Software (source, version)	E	Page 6, lines 167-170
Cq or raw data submission using RDML	D
Table 1. MIQE checklist for authors, reviewers and editors. All essential information (E) must be submitted with the manuscript. Desirable
information (D) should be submitted if available. If using primers obtained from RTPrimerDB, information on qPCR target, oligonucleotides,
protocols and validation is available from that source.
*: Assessing the absence of DNA using a no RT assay is essential when first extracting RNA. Once the sample has been validated as
RDNA-free, inclusion of a no-RT control is desirable, but no longer essential.
**: Disclosure of the probe sequence is highly desirable and strongly encouraged. However, since not all commercial pre-designed assay
vendors provide this information, it cannot be an essential requirement. Use of such assays is advised against.
